1  
2  
3  
4  
5  
6  
7  
8  
9  
10  
11  
12  
13  
14  
15  
16  
17  
18  
19  
20  
21

## Interplay of mesoscale physics and agent-like behaviors in the parallel evolution of aggregative multicellularity

Juan A. Arias Del Angel,<sup>1,2,3,4†</sup> Vidyanand Nanjundiah,<sup>5</sup> Mariana Benítez,<sup>1,2</sup> and Stuart A. Newman<sup>3</sup>

<sup>1</sup>Laboratorio Nacional de Ciencias de la Sostenibilidad, Instituto de Ecología, Universidad Nacional Autónoma de México, Ciudad de México, México

<sup>2</sup>Centro de Ciencias de la Complejidad, Universidad Nacional Autónoma de México, Ciudad de México, México

<sup>3</sup>Department of Cell Biology and Anatomy, New York Medical College, Valhalla, NY 10595, USA

<sup>4</sup>Programa de Doctorado en Ciencias Biomédicas, Universidad Nacional Autónoma de México, México

<sup>5</sup>Centre for Human Genetics, Electronic City (Phase I), Bengaluru 560100, India

†d. 2019

Contact: [mбенitez@ieciologia.unam.mx](mailto:mбенitez@ieciologia.unam.mx) (MB); [vidyan@alumni.iisc.ac.in](mailto:vidyan@alumni.iisc.ac.in) (VN); [newman@nymc.edu](mailto:newman@nymc.edu) (SAN)

22 **ABSTRACT**

23 Myxobacteria and dictyostelids are prokaryotic and eukaryotic multicellular lineages,  
24 respectively, that after nutrient depletion aggregate and develop into structures called fruiting  
25 bodies. The developmental processes and the resulting morphological outcomes resemble one  
26 another to a remarkable extent despite their independent origins, the evolutionary distance  
27 between them and the lack of traceable levels of homology in the molecular mechanisms of the  
28 groups. We hypothesize that the morphological parallelism between the two lineages arises as  
29 the consequence of the interplay, within multicellular aggregates, between *generic processes*,  
30 physical and physicochemical processes operating similarly in living and non-living matter at the  
31 mesoscale ( $\sim 10^{-3}$ - $10^{-1}$  m) and *agent-like behaviors*, unique to living systems, characteristic of  
32 the constituent cells. To this effect, we analyze the relative contribution of the generic and  
33 agent-like determinants in the main phenomena of myxobacteria and dictyostelid development,  
34 and their roles in the emergence of their shared traits. We show that as a consequence of  
35 aggregation collective cell-cell contacts mediate the emergence of liquid-like properties, making  
36 nascent multicellular masses subject to new sets of patterning and morphogenetic processes. In  
37 both lineages, this leads to behaviors such as streaming, rippling, and rounding up, similar to  
38 effects observed in non-living fluids. Later the aggregates solidify, leading them to exhibit  
39 additional generic properties and motifs. We consider evidence that the morphological  
40 phenotypes of the multicellular masses deviate from the predictions of generic physics due to  
41 the contribution of agent-like behaviors. These include directed migration, quiescence, and  
42 oscillatory signal transduction of the cells mediated by responses to external cues acting  
43 through species-specific regulatory and signaling mechanisms reflecting the evolutionary  
44 histories of the respective organisms. We suggest that the similar developmental trajectories of  
45 Myxobacteria and Dictyostelia are more plausibly due to shared generic physical processes in  
46 coordination with analogous agent-type behaviors than to convergent evolution under parallel  
47 selection regimes. Finally, we discuss the broader implications of the existence and synergy of  
48 these two categories of developmental factors for evolutionary theory.

49  
50 **Key words:** myxobacteria; dictyostelids; liquid tissues; deformable solids; excitable  
51 media

## 52 INTRODUCTION

53 The emergence of multicellular organisms exhibiting cell differentiation, spatial patterning and  
54 morphogenesis has been recognized as one of the major transitions in evolution (Maynard  
55 Smith and Szathmáry, 1995). Depending on the criteria applied (cell–cell attachment, cell  
56 communication, division of cell labor, among others) multicellularity evolved on anywhere  
57 between 10 and 25 independent occasions (Niklas and Newman, 2013; Niklas and Newman,  
58 2019). The appearance of multicellular organisms enabled an extraordinary increase in the  
59 complexity of living systems and the study of the developmental mechanisms and selective  
60 forces leading to its emergence, maintenance, and variation is an active research area (e.g.,  
61 Niklas and Newman (2016). In broad terms, multicellular organisms can be classified either as  
62 aggregative (“coming together”) or zygotic (“staying together”), according to the mechanism by  
63 which multicellularity arises (Bonner, 1993; Tarnita et al., 2013). In the former, multicellular  
64 organisms develop through the gathering of several individual cells potentially belonging to  
65 different genetic lineages; in the latter, all the cells in the organism are the offspring of a single  
66 cell and remain attached to each other after cell division (Bonner, 1998; Grosberg and  
67 Strathmann, 2007). Across eukaryote lineages, aggregative multicellularity involves amoeboid  
68 cells and leads to the formation of a fruiting body or “sorocarp” (Brown and Silberman, 2013).  
69 There appear to be ecological determinants (e.g., resource availability, land vs. water  
70 environment) of whether organisms are clonal or aggregative (Bonner, 1998; Fisher et al., 2019;  
71 Hamant et al., 2019). Furthermore, clonal lineages do not always exhibit complex development  
72 with different cell types and arrangements, and aggregative ones often do (Newman, 2014b;  
73 Newman, 2019c; Niklas and Newman, 2019).

74 Dictyostelia and Myxobacteria are eukaryotic and prokaryotic multicellular lineages,  
75 respectively (Romeralo et al., 2013a; Yang and Higgs, 2014). In these lineages, the life cycle  
76 comprises a vegetative and a developmental stage. In the vegetative stage, Dictyostelia behave  
77 as solitary cells acting independently of each other, and with the possible exception of  
78 intercellular repulsion during feeding (Keating and Bonner, 1977), only engage in cell-cell  
79 interactions during development. In contrast, Myxobacteria, often referred to as social bacteria,  
80 are believed to organize into cell consortiums through their entire life cycles, although single-  
81 cell-specific behaviors are observed in the laboratory (Thutupalli et al. (2015) and unpublished  
82 observations). Both lineages are commonly found in soils where they feed upon (other) bacterial  
83 species. Once nutrients have been depleted, they transit into a developmental stage  
84 characterized by a substratum-dependent cellular aggregation that culminates in the formation

85 of multicellular structures called fruiting bodies, containing up to  $10^5$ - $10^6$  cells, where cell  
86 differentiation takes place (Whitworth, 2008).

87 The basis of cell differentiation in *D. discoideum* has been explained in two ways. There are  
88 pre-aggregation tendencies among amoebae, stochastic in origin, biased by the environment  
89 they experienced during the phases of growth and division, or, cell differentiation is a post-  
90 aggregation phenomenon based on intercellular interactions and diffusible morphogens  
91 (reviewed in (Nanjundiah and Saran 1992). There is experimental evidence for each of the two  
92 viewpoints (Kawli and Kaushik, 2001), and it is also clear that subsequent interactions can  
93 override cell-autonomous tendencies (Raper, 1940).

94 In Myxobacteria development, cells commit to at least three different cell types, peripheral  
95 rods, spores and autolysis. In Dictyostelia, there are principally only two terminal cell types, stalk  
96 and spore cells, with several transitory cell types (different pre-stalk and pre-spore subtypes)  
97 observed over the normal course of development. Phylogenetic analyses suggest that the  
98 capacity for cellular differentiation predated the emergence of multicellular development in both  
99 lineages (Arias Del Angel et al., 2017; Schaap et al., 2006). Theoretical studies show that  
100 cellular differentiation can spontaneously arise by the coupling of multistable cellular systems  
101 (Furusawa and Kaneko, 2002; Mora Van Cauwelaert et al., 2015).

102 The morphology of fruiting bodies in both lineages displays a similar extent of diversity  
103 ranging from simple mound-like to highly branched tree-like structures. Morphology is a species-  
104 dependent trait, though there are examples in the dictyostelids of the fruiting body of one  
105 species mimicking the morphology of another (Bonner, 2009). For neither Myxobacteria nor  
106 Dictyostelia are fruiting bodies morphologies a monophyletic trait (Arias Del Angel et al., 2017;  
107 Schaap et al., 2006), and thus different forms are likely to have evolved multiple times within  
108 each lineage.

109 The issue of convergence becomes even more remarkable when it is recognized that  
110 sorocarpic amoebae like those of Dictyostelia occur in five of the seven supergroups into which  
111 eukaryotes are divided. (Archaeplastids, the group containing red algae, green algae, and  
112 plants, appear to be the sole exception. In another supergroup, the Alveolates, aggregative  
113 multicellularity and fruiting body formation occurs, but in ciliates, not amoebae (Bonner, 2009;  
114 Brown and Silberman, 2013).

115 Perhaps more surprising is the resemblance of developmental processes and resulting  
116 morphologies between eukaryotic sorocarpic amoebae such as Dictyostelia and the prokaryotic  
117 Myxobacteria, despite their independent origins, the evolutionary distance between them, and  
118 the lack of traceable homology in the molecular mechanisms in each group (Fig. 1). Bonner

119 (1982) suggested that the parallelisms between Myxobacteria and Dictyostelids appear as a  
120 consequence of either similar selective pressures or shared developmental constraints. But  
121 these determinants are not mutually exclusive and discrimination between them is not trivial  
122 (Olson, 2012). Kaiser (1986) proposed that a joint investigation of Myxobacteria and Dictyostelia  
123 could potentially lead to the identification of generalities underlying the multicellular phenotypes  
124 across both lineages.

125 Since Kaiser's proposal, a combination of experimental and modeling approaches has been  
126 employed to investigate the development in these two lineages (Romeralo et al., 2013b; Yang  
127 and Higgs, 2014). Such studies advanced after physico-chemical processes came to be  
128 considered as key factors determining the developmental outcomes (Bretschneider et al., 2016;  
129 Fujimori et al., 2019; Thutupalli et al., 2015; Umeda and Inouye, 2002). Specifically, there is a  
130 recognition that the shaping of multicellular masses cannot be explained independently of their  
131 material properties, and that developing organisms are thus subject to physical forces and  
132 effects relevant to their composition and scale (Benítez et al., 2018; Newman, 2014a; Newman  
133 and Bhat, 2009; Rivera-Yoshida et al., 2018). When applied, for example, to embryonic animal  
134 tissues, which behave similarly, in certain respects, to non-living liquids and liquid crystals,  
135 physical models predict the formation of immiscible layers, interior spaces, and, when the  
136 subunits are anisotropic, the capacity to undergo elongation (Newman and Bhat, 2009). In  
137 contrast, plant tissues, characterized by rigid cell walls, behave like deformable, mechanically  
138 and chemically active solids which (unlike liquid-state materials) can bud or branch (Benítez et  
139 al., 2018).

140 Properties shared by cellular masses with (as the case may be) nonliving liquids, solids, or  
141 semisolid materials have been termed "generic" (Newman and Comper, 1990), and we adopt  
142 that term here. The physical forces, effects and processes inherent to such materials enable  
143 and constrain developmental outcomes in multicellular masses, leading to the conclusion that  
144 homoplasy (the same form, independently evolved) is expected to be common, and some  
145 morphological motifs should be recurrent and predictable (Benítez et al., 2018; Newman,  
146 2014a). Physical determinants, in this view, are complementary to the regulatory dynamics  
147 within cells. Indeed, physical and physicochemical processes are mobilized on the multicellular  
148 scale by genes, their products and other molecules, and are thus subject to regulation  
149 throughout evolution (Benítez et al., 2018).

150 In contrast to the molecular subunits of non-living materials, the individual cells constituting  
151 a multicellular cluster are able to sense and respond to local cues through signaling and  
152 regulatory pathways. Because of their intracellular chemical dynamics and capacity to generate

153 mechanical forces, cells can be understood as agents that actively modify their behavior in  
154 response to their environment, and even modify their environment in ways that can further affect  
155 the cell-environment interaction. These processes taking place at the cell level, including  
156 chemotaxis, which as discussed in Section 4, can continue even when the cells are already  
157 aggregated, can translate into collective behaviors that act in parallel and coordination with, and  
158 even oppose, the generic physical processes that shape a tissue mass. These “agent-like”  
159 behaviors modify the outcomes that would be expected if only generic physical processes were  
160 operative.

161 Here, we hypothesize that the morphological outcomes, and thus the parallelism between  
162 the myxobacterial and dictyostelid lineages, originated as a consequence of the interplay  
163 between generic processes acting upon the multicellular materials and agent-like behaviors  
164 characteristic of the constituent cells. To this end, we describe the major generic and agent-like  
165 properties exhibited during the development of these lineages and attempt to analyze their  
166 contributions to the emergence of the groups’ shared traits. We suggest that as a consequence  
167 of aggregation, the nascent multicellular mass becomes subject to new sets of patterning and  
168 morphogenetic processes resulting from the fact that cell-cell contacts or immersion in a matrix  
169 mediate the emergence of a fluid-like properties. In both lineages, this leads to developmental  
170 processes, e.g., streaming, rippling, that are similar to behaviors observed in non-living fluids.  
171 We explore the idea that deviations of the dynamics and morphological outcomes of the  
172 multicellular mass from the generic predictions are due to the contribution of agent-like  
173 behaviors of individual cells, e.g., gradient sensing, directed migration, quiescence.

174 Generic effects are *common causes* in the different lineages. This is because whatever  
175 molecules underlie the realization of properties such as cell-cell adhesion, spatial heterogeneity  
176 via diffusion gradients, and so in in different lineages, the morphological outcomes are similar by  
177 virtue of being produced by similar physical generative processes. Agent-behaviors, in contrast,  
178 are peculiar to disparate lineages (cell locomotion, for example, has very different physical and  
179 genetic bases in prokaryotes and eukaryotes, as does entry into the quiescent state), reflecting  
180 the evolutionary histories of the respective organisms. However, these behaviors can be  
181 analogous to one another, thus contributing to convergent morphological outcomes. Further,  
182 analogous intracellular dynamical behaviors such as biochemical oscillation can be organized  
183 by generic effects such as synchronization, leading to additional shared generic modes of  
184 organization. We conclude that the similar developmental programs of Myxobacteria and  
185 Dictyostelids are plausibly due to shared generic physical processes in coordination with  
186 analogous agent-like behaviors.

187

188 **GENERIC MATERIAL PROPERTIES OF MYXOBACTERIAL AND DICTYOSTELID**  
189 **MULTICELLULAR MASSES**

190 Based on the observation that animal life is characterized by a restricted set of basic forms and  
191 patterns, Newman and co-workers advanced the conceptual framework of “dynamical patterning  
192 modules” (DPMs). DPMs are defined as sets of gene products and other molecules in  
193 conjunction with the physical and physicochemical morphogenetic and patterning processes  
194 they mobilize in the context of multicellularity (Newman and Bhat, 2008; Newman and Bhat,  
195 2009). These include phenomena such as adhesion and differential adhesion, and reaction-  
196 diffusion effects. This framework emphasizes that the material nature of a developing organism  
197 makes it subject to generic physical processes (i.e., those common to living and nonliving  
198 viscoelastic and excitable systems) and that they readily exhibit morphological motifs – layers,  
199 segments, protrusions – Inherent to the respective materials. The term “module” is employed to  
200 highlight the semi-autonomous action of DPMs in determining specific spatial patterns and  
201 structures. But the DPMs also interact during development and can thus be conceptualized as a  
202 complex “pattern language” for generating organismal form (Hernández-Hernández et al., 2012;  
203 Newman and Bhat, 2009). This approach is distinguished from a purely “tissue physics”  
204 framework since it also recognizes the relevance of the cells as repositories of genetic  
205 information, making such systems subject to evolutionary processes not applicable to non-living  
206 matter.

207 Even when the similarity in the mesoscopic (i.e., physics of the middle scale) properties of  
208 living and certain kinds of non-living matter is recognized, it should not be taken to imply that  
209 they are constituted in the same way. The liquid or solid nature of living tissues does not arise  
210 from the same subunit-subunit interactions that endow non-living materials with these  
211 properties. This is particularly the case with the liquid-like state of animal tissues. Instead of the  
212 thermal vibration- driven Brownian motion that causes the molecular subunits of non-living  
213 liquids to move randomly, the cells in animal tissues move actively by ATP-dependent  
214 cytoskeleton-generated forces, which in the absence of external signals is also random. Despite  
215 continually changing their neighbors, subunits of nonliving liquids cohere due to the weakly  
216 attractive electronic interactions that hold them together. The cells of developing animal tissues  
217 also remain cohesive despite their translocation, but for a different reason: the homophilic  
218 attachment proteins (classical cadherins) that mediate their transient attachment extend through  
219 the cells’ membranes to form stable connections between adhesive and motile functions  
220 (Newman, 2019b). In plant and fungal tissues, instead of the charge-based or covalent bonds of

221 the atomic or molecular subunits of non-biological solids, the cells are cemented together by  
222 pectins and glycoproteins which are subject to unique forms of reversible remodeling (Benítez et  
223 al., 2018; Hernández-Hernández et al., 2012). Because these generic properties are dependent  
224 on evolved biological, rather than purely physical effects, the various viscoelastic and  
225 deformable solid materials that constitute living tissues have been termed “biogeneric” matter  
226 (Newman, 2016).

227 In the following, we describe some of the generic and biogeneric properties and processes  
228 of Myxobacteria and Dictyostelia multicellular masses and compare these properties to those  
229 implicated in animal development. Then, we describe the molecular components that establish  
230 and mobilize these properties in both Myxobacteria and Dictyostelia. Next, we highlight some  
231 developmental phenomena in these organisms and evaluate the extent to which these can be  
232 explained by generic physical behaviors, and what is left unaccounted for. Finally, we describe  
233 the agent-like behaviors of the subunits (bacteria and amoeba) of the two systems, discuss their  
234 similarities and differences, and discuss how analogous agent behaviors coordinate with and  
235 complement the described generic properties, and potentially account for the common  
236 developmental modes of Myxobacteria and Dictyostelia.

237

### 238 **Adhesion- and matrix-based cell-cell association**

239 Cell adhesion is the defining characteristic of multicellular organisms and the nature and  
240 strength of cell bonding is a major determinant of tissue properties (Forgacs and Newman,  
241 2005; Mora Van Cauwelaert et al., 2015; Niklas and Newman, 2019). In animals, cell-cell  
242 adhesion is mediated by membrane proteins such as cadherins that permit cells to be  
243 independently mobile and capable of moving relative to another while remaining cohesive. As  
244 noted above, the animal tissues from which embryos and organs develop behave formally like  
245 liquids (Newman, 2016).

246 In *D. discoideum*, cell-cell adhesion at early stages of development involves the action of  
247 several proteins including the immunoglobulin-like DdCAD-1 and the glycoproteins gp80 and  
248 gp150 whose expression and activities are tightly regulated during the different stages of  
249 development (Coates and Harwood, 2001). Later in development, when cells have entered into  
250 streams and cell density has increased, the cells are also embedded in cellulose-based  
251 matrices that provide the basis for adhesion in cellular conglomerates (Huber and O'Day, 2017).  
252 In the case of *M. xanthus*, persistent cohesion is correlated with the secretion of thick fibrils,  
253 composed of carbohydrates and proteins, that coat the cell surface and constitute an  
254 extracellular matrix that interconnects the cells (Arnold and Shimkets, 1988; Behmlander and



255 Dworkin, 1994a; Behmlander and Dworkin, 1994b). Chemical or genetic disruption of fibrils  
256 causes defects in agglutination and failures in social and developmental behaviors. In a similar  
257 fashion to the animals, cell-cell adhesion in Myxobacteria and Dictyostelia depend, to different  
258 degrees, on the presence of divalent cations (Lin et al., 2006; Shimkets, 1986).

259 Both Myxobacteria and Dictyostelia also have strong associations with external substrata  
260 during their pre-culmination stages of development. The closest analogy in animal systems is  
261 the interaction of cell layers in eumetazoans with internally generated planar basal laminae,  
262 which are not generally present in the earliest diverging and morphologically simplest  
263 metazoans, sponges and placozoans. In both Myxobacteria and Dictyostelia cells are more  
264 loosely associated with one another as they interact with the substratum than are the cells in  
265 planar animal epithelia. In the non-animal systems, cell substratum interactions depend on focal  
266 adhesions that indirectly (in contrast to directly in animal tissues) mediate communication  
267 between the substratum and the actin cytoskeleton, where they also provide the foundation for  
268 cellular motility (Faure et al., 2016; Fukujin et al., 2016).

269 A key difference between the respective lineages is that dictyostelid cells only engage in  
270 persistent cell-cell interactions shortly after starvation, whereas extensive cell-cell adhesion and  
271 interactions take place among myxobacterial cells through their entire life cycle. While the  
272 mechanisms involved in cell-cell and cell-substratum contact between Myxobacteria and  
273 Dictyostelia are different, in both cases the bonds between adjacent cells are weak enough to  
274 allow cells to rearrange relative to one another during aggregation and shortly after mounds are  
275 formed. Therefore, aggregating cells in these lineages behave like non-living liquids, exhibiting  
276 streaming and rippling behaviors characteristic of such materials. This contrasts with  
277 monolayered animal tissues (epithelia) which, though also having liquid-like properties in the  
278 plane, bind too strongly to their intra-organismal substrata, *basal laminae*, to manifest similar  
279 fluid-like behaviors at the planar interface (Mittenthal and Mazo, 1983).

280 Unlike Dictyostelia, in Myxobacteria some type of cell-cell adhesion or matrix embedment is  
281 present throughout the whole life cycle, causing cellular masses to exhibit liquid-like behaviors  
282 in both vegetative and developmental stages (Thutupalli et al., 2015). During predation, cells  
283 align and move concertedly into ripple-like travelling waves (Zhang et al., 2012). Once  
284 development has started, *M. xanthus* aggregation is largely driven by entropy minimization  
285 through reduction of the surface area on which the collective cell population contacts the  
286 substratum (Bahar et al., 2014). This is a comparable behavior to that of liquid droplets, where  
287 individual subunits or clusters move into larger droplets of larger volume but smaller contact  
288 area with the surface. In Myxobacteria, phase separation has not been implicated in sorting of

289 cell types inside fruiting bodies. However, since spores are coated by material that increases  
290 cell cohesiveness, differential adhesion likely contributes to the spontaneous sorting out of  
291 spores from peripheral rod cells, reflecting their liquid-like properties.

292 It is important to distinguish the liquid-like properties of both Dictyostelia and Myxobacteria  
293 cell streams and masses from that of embryonic animal tissues. In epithelioid animal tissues the  
294 cells are directly attached to their neighbors by transmembrane cadherins which maintain strong  
295 cohesivity while permitting rearrangement. This is consistent with persistent apicobasal  
296 polarization that allows for the formation of lumens within cell masses, and planar cell  
297 polarization that permits elongation and other reshaping of tissues by intercalation and  
298 convergent extension, a liquid-crystalline like phase transformation. In Dictyostelia, the cells are  
299 embedded in cellulose-based matrices that enable cell rearrangement and hence the liquid-like  
300 behaviors described above (Huber and O'Day, 2017). However, the lack of direct engagement  
301 in this attachment mode with the cytoskeleton makes cell polarization, even when it occurs,  
302 transient and un conducive to lumen formation or stable intercalation (Manahan et al., 2004;  
303 however, see Hayakawa et al. (2020)). Cells of Dictyostelia also have a more pronounced  
304 chemotactic response to extracellular signals than most animal embryonic cells, which  
305 contributes to their particular version of liquid-tissue properties (Tan and Chiam, 2014) (see  
306 below).

307 The glycoprotein-based associations of Myxobacterial cells are also too transient, and their  
308 polarity too rapidly reversible, to allow lumens to form, at least until solidification occurs during  
309 fruiting body formation (see below). However, the cells are stably elongated by default, and thus  
310 readily form liquid crystalline-like domains as in some animal tissues (Thutupalli et al., 2015).  
311 The rapid relative movement of the cells, though, causes these to be only local and temporary.

312

### 313 **Solidification**

314 The generic-type fluid-to-solid transitions seen during development of the aggregative species  
315 can productively be considered in relation to well-studied ones in animal embryogenesis. Animal  
316 tissues during early stages of development, as noted above, behave in important ways like non-  
317 living liquids. As development proceeds, however, some tissues undergo a transformation  
318 where cell movements become constrained and the cellular mass behaves more like a solid  
319 (Newman, 2019b). In these tissues, solidification may provide increased mechanical integrity,  
320 and new morphological outcomes and constructional elements (e.g., exo- and endoskeletons)  
321 arise with the physical properties of these materials. The most typical way solidification occurs is  
322 by the deposition of stiff extracellular matrices (ECM), consisting of fibrous and nonfibrous

323 proteins such as collagen and elastin, covalently linked to, or complexed with  
324 glycosaminoglycan-type polysaccharides. These ECMs can also become mineralized, as in  
325 bone and tooth. More recently, “jamming,” a liquid-to-solid transition known from colloid physics  
326 (Bi et al., 2011) has been shown to occur in liquid-state tissues as a result of increased cell-cell  
327 adhesivity (Mongera et al., 2018).

328 In *D. discoideum*, cells are embedded in an ECM that once aggregation is complete defines  
329 the boundaries of the aggregate. Aggregation in this and related species leads to the formation  
330 of a migratory “slug” (see below), which once it reaches its final position, forms a fruiting body  
331 by building up a stalk that takes cellular material away from the surface, and in which terminal  
332 cell differentiation takes place. Membrane proteins involved in cell-cell adhesion are expressed  
333 in a cell-type dependent fashion. Spores and stalk cells phase separate, in part, due to the  
334 resulting differential adhesion, in agreement with the expected behavior of immiscible liquids  
335 (e.g., water-oil mixtures), although other factors such as chemotaxis and differential cell motility  
336 are also involved (see below) (Bretschneider et al., 2016; Raper, 1940).

337 During fruiting body elevation deposition of ECM, is required for the stiffening and  
338 construction of the stalk (Palsson, 2008) (Dickinson et al., 2012). Solidification occurs unevenly  
339 across the cellular mass. While the movement of cells in the stalk becomes constrained  
340 because of the ECM, the remaining cells move upwards as the stalk continues to be built up  
341 following the expected dynamics of solidifying non-living liquids. In Myxobacteria, deposition of a  
342 stiff ECM appears to be the most important factor in aggregation, but the “solidification” of  
343 maturing fruiting bodies may also involve jamming (Hu et al., 2012; Liu et al., 2019; Thutupalli et  
344 al., 2015) see below).

345

### 346 **Differential loss of mass**

347 In animal morphogenesis, differential loss of mass can be achieved through programmed cell  
348 death (e.g., apoptosis, autophagy and necrosis) where, in addition to acting as cue for signaling  
349 pathways, it can also induce tissue reshaping by cell elimination or mobilization of mechanical  
350 forces (Monier and Suzanne, 2015; Suzanne and Steller, 2013). In both Myxobacteria and  
351 Dictyostelia, it has been suggested that programmed cell death may act as a mechanism for  
352 nutrient release and recycling that can be employed for the remaining cells in the population as  
353 source of energy and cellular materials (Boynton et al., 2013; Mesquita et al., 2017). However,  
354 localized developmental lysis may also be relevant in mechanical reshaping multicellular  
355 microbial masses. For example, localized cell death mobilizes mechanical forces that are  
356 instructive for the generation of key features during development of *B. subtilis* biofilms (Asally et

357 al., 2012). In Myxobacteria, where most of the cells in the initial population undergo  
358 developmental lysis, lysed cells may serve to strengthen the ECM (Hu et al., 2012). Specifically,  
359 exopolysaccharides embedded in the ECM interact with extracellular DNA. As a consequence,  
360 the ECM exhibits greater strength and stress resistance (Hu et al., 2012). While the origin of this  
361 extracellular DNA remains unclear, it may be released by cells after lysis. In Myxobacteria and  
362 Dictyostelia, peripheral rods and stalk cells, respectively, die after the stalk has been built up. In  
363 both, cell death is a consequence of nutrition deprivation. In the dictyostelids, it shows  
364 similarities as well as differences with the manner in which cell death is regulated in metazoan  
365 tissues (Arnoult et al., 2001; Cornillon et al., 1994; de Chastellier and Ryter, 1977; Kawli et al.,  
366 2002).

367 Additional generic effects can arise in cell masses from, e.g., synchronization of intracellular  
368 biochemical oscillations. Some of these will be characterized below, after the roles of such  
369 pivotal cellular functions in individual cell behavior are described.

370

### 371 **AGENT-LIKE BEHAVIORS IN MYXOBACTERIA AND DICTYOSTELIA**

372 Previous descriptions of the development of embryonic animal and plant tissues in terms of  
373 material properties of multicellular assemblages have accounted for key morphological features  
374 on the basis generic physical processes pertaining to these materials without invoking the idea  
375 that individual cellular subunits of such materials act as autonomous agents in creating  
376 multicellular forms and patterns (see, e.g., (Benítez et al., 2018; Newman, 2016). Although the  
377 constituent cells in these generic accounts are assumed to carry out metabolic and synthetic  
378 functions necessary to sustain life, to change their state (including polarity) in response to  
379 external signals (Niklas et al., 2019), and (in the case of animal systems) locomote randomly,  
380 the materials-based perspective does not involve formal sets of rules governing cellular  
381 interactions of individually mobile cells. Similarly, as seen in the previous section, several  
382 important aspects of Myxobacteria and Dictyostelia development can be explained by  
383 considering them as generic materials, that is, considering the cell streams and masses as  
384 generic liquid-like or solid-like materials.

385 However, attempts to computationally model aggregation of Myxobacteria and Dictyostelia  
386 cells and the resulting multicellular masses based on generic mesoscale physics have found the  
387 need to incorporate agent-like behaviors of the cells themselves into the models to capture the  
388 relevant behaviors (Bahar et al., 2014; Fujimori et al., 2019; Marée and Hogeweg, 2001;  
389 Thutupalli et al., 2015). (Following standard usage (Thorne et al., 2007) we define agents as  
390 autonomous entities acting according to internal rules in a shared environment.) For biological

391 agents such as Myxobacteria and Dictyostelia cells these “rules” depend on intracellular  
392 dynamics of molecules and pathways.

393 In biological development, agent-based phenomena pertain to the semi-autonomous  
394 activities of individual cells or cells in transient associations with each other. This contrasts with  
395 the collective effects governed by generic physical processes operating at the mesoscale.  
396 Unlike nonliving systems, the subunits of tissues, aggregates, and presumptive aggregates are  
397 living cells that are internally complex and chemically, mechanically, and electrically active and  
398 potentially excitable. Cell dynamics can modulate the properties of biomaterials, making a liquid-  
399 like animal tissue liquid-crystalline, for example, or a solid plant tissue locally expansible. When  
400 cells act as individuals, however, alterations in their internal states can give them agent-like  
401 properties when interacting with other such agents or features of the environment. The reality of  
402 this distinction is illustrated by a recent study of neural crest migration where, exceptionally in  
403 animal systems, cells navigate directionally through surrounding tissues in loose association  
404 with each other. Consequently an agent-based modeling approach was deemed necessary  
405 (Giniunaite et al., 2020a).

406 In certain cases, generic properties and agent-like effects mobilize the same intracellular  
407 activities and processes. For instance, random cell movement, driven by actomyosin-based  
408 contractile and protrusive activity, is essential to the liquid-like state of animal tissues. These  
409 processes in individual amoeboid cells can also be mobilized for directional locomotion.  
410 Similarly, concerted induction of cell polarity in animals and plants can impart anisotropy to the  
411 respective tissues, changing their shapes and topology (Nance, 2014; Niklas et al., 2019). In  
412 single amoeboid or bacterial cells, in contrast, polarity is essential in the sensing of chemical  
413 and substrate gradients and directed navigation. Lastly, intracellular biochemical oscillation in  
414 animal, amoebal, or bacterial cell collectives can attain synchrony, thereby causing it to behave  
415 as a “morphogenetic field” in which cell states are coordinated at long distances across the  
416 multicellular mass (Bhat et al., 2019 and references below).

417 As described above, multicellular systems can exhibit predictably similar morphological and  
418 patterning outcomes as a result of mobilizing generic mesoscale physics. Agent-like behaviors,  
419 however, are not generic in the same in sense, and their outcomes do not have the same kind  
420 of shared inherency, since the rules that individual cells follow in relating to other cells and their  
421 external environments are specific to each lineage and dependent on their respective  
422 evolutionary histories. As mentioned above, and exemplified in the phenomena of directed  
423 migration, regulated quiescence, and oscillation-based cell-cell communication, agent-like  
424 behaviors of cells as distantly related as Dictyostelia and Myxobacteria can sometimes have

425 analogous morphological outcomes. This, combined with the generic effects with which they  
426 interact in the development of multicellularity, contribute to the strikingly similar morphological  
427 motifs in these disparate systems.

428

### 429 **Directed migration**

430 During animal embryogenesis, the displacements of cells relative to another can be largely  
431 understood in terms of random movements analogous to the Brownian motion of the molecular  
432 subunits of non-living liquid systems (Newman and Bhat, 2009). In Dictyostelia and  
433 Myxobacteria, in contrast, cell trajectories deviate from the undirected motion of most animal  
434 tissues due to the action of signaling and regulatory mechanisms. These bias the direction and  
435 speed of cell movement in response to local cues in ways that may change as development  
436 progresses. We suggest that some particularities of Dictyostelia and Myxobacteria observed at  
437 the mesoscale (notwithstanding their shared liquid-like behaviors) derive from the distinct  
438 mechanisms underlying directed cell migration in these two groups.

439 In Dictyostelia, cell movement occurs by amoeboid motion, which is driven by cytoplasmic  
440 actomyosin-based contractile and protrusive activity just as in animal cells (Fukui, 2002). In  
441 contrast to the generally random cell locomotion seen in animal tissues, however, Dictyostelia  
442 exhibit both random movement and directed movement via chemotaxis, which can be thought of  
443 as a biased random walk. Amoebae seek food by chemotaxis. Aggregation is also mediated by  
444 chemotaxis, but to an aggregation pheromone (e.g., cAMP). Chemotaxis remains essential for  
445 all subsequent developmental stages (Du et al., 2015). It dependent on both the physical  
446 process of diffusion of the chemoattractant (which is not a generic tissue mechanism since it is  
447 outside the cell mass) and agent-like behavior in response to the chemoattractant signaling at  
448 the cellular level. Specifically, chemotaxis is a quantifiable outcome of directional pseudopod  
449 extension (Chopra and Nanjundiah, 2013).

450 In *D. discoideum*, the response to the chemoattractant cyclic AMP (cAMP) involves an  
451 oscillatory dynamics of excitation and adaptation (see below). The formation of streams with  
452 high cellular density is facilitated by the collective movement of cells coordinated by chemotaxis  
453 towards higher concentrations of cAMP. While cellular movements are most prominent at the  
454 aggregation stages, extensive cell translocation still take place at later stages of the  
455 development with chemotaxis biasing the individual movements. Cell movements remain  
456 operational in the concerted movement of cells within a slug (Singer et al. (2019) but see  
457 Hashimura et al. (2019). Finally, in **slugs and** maturing fruiting bodies, chemotaxis operates  
458 jointly with differential adhesion to drive cell sorting (an authentically generic tissue process)

459 where it also provides the basis for fruiting body elongation (Matsukuma and Durston, 1979;  
460 Schaap, 2011; Tan and Chiam, 2014).

461 In the case of Myxobacteria, where cells are rod-shaped, the presence of protein  
462 complexes that promote motility defines a lagging and a leading pole (Guzzo et al., 2018). Cells  
463 in transient contact with their neighbors move along their long axis in the direction of the leading  
464 pole, with reversals in the direction of movement being a major agent-type behavior in  
465 Myxobacteria motility. Reversals occur by switching the cellular polarity (i.e., the leading pole  
466 turns into the lagging pole and vice-versa) and net cellular displacement is influenced by the  
467 reversal frequency (Cotter et al., 2017). At the molecular level, reversals are controlled by the  
468 Frz and MglAB intracellular oscillators (Guzzo et al., 2018; Igoshin et al., 2004). Directed  
469 migration is favored during development by a reduction in the frequency of reversal that allows  
470 cells to retain their direction and aggregate. This frequency reduction is stimulated by cell-cell  
471 contacts, likely involving the exchange of intercellular signals, which become more frequent as  
472 aggregation proceeds and cellular density increases (Cotter et al., 2017; Zhang et al., 2018). An  
473 additional mechanism underlying directed migration in Myxobacteria is *stigmergy*, by which  
474 individual cellular movement is biased by cues left behind by other cells (Gloag et al., 2016).  
475 Specifically, while moving over solid surfaces, *M. xanthus* cells deposit slime material that forms  
476 trails over which other cells travel preferentially.

477 In both Myxobacteria and Dictyostelia, the interplay between directed migration, an agent-  
478 like behavior, and generic material properties highlights the need to consider them together in  
479 accounting for development. In *D. discoideum*, cell sorting requires agent-like behaviors  
480 (directed migration) and generic properties (differential adhesion) for its completion. In  
481 Myxobacteria mesoscopic movement patterns are the result of the joint effect of the agent-like  
482 behavior of directed migration and generic liquid-like behavior enabled by transient cell-cell  
483 adhesion. In addition to these, the different phenomena observed along Myxobacteria life cycle  
484 also require cellular alignment that may occur spontaneously as a generic property of rod-  
485 shaped particles and cells (Janulevicius et al., 2015; Volfson et al., 2008).

486

#### 487 **Cessation of movement and quiescence**

488 Development in *M. xanthus* and other myxobacteria starts as a response to starvation (Dworkin,  
489 2007). Once it is sensed, ribosomes stall and the enzyme RelA increases the intracellular  
490 concentration of the tetra- and pentaphosphate alarmones (p)ppGpp which, as in most bacteria,  
491 induces the so-called stringent response (SR; (Boutte and Crosson, 2013; Cabello et al., 2017;  
492 Chatterji and Ojha, 2001; Manoil and Kaiser, 1980a; Manoil and Kaiser, 1980b; Shimkets,

493 1999). As (p)ppGpp accumulates, proteases are synthesized and exported, leading to an  
494 extracellular mixture of amino acids and peptides (A-signal), where it mediates a quorum-  
495 sensing mechanism that enables a coordinated population-level response to starvation,  
496 including specifying the minimal cell density required for initiation of development (Kuspa et al.,  
497 1992). Myxobacteria respond to nutrient depletion via the SR, but also require high cell density  
498 to initiate fruiting body and spore development. To effect this, in addition to conserved SR  
499 components, Myxobacteria produce CgsA, which positively regulates (p)ppGpp and is in turn  
500 positively regulated by it, and SocE, which suppresses and is suppressed by the production of  
501 (p)ppGpp (Boutte and Crosson, 2013; Crawford and Shimkets, 2000a; Crawford and Shimkets,  
502 2000b). Therefore, when A-signal rises to the concentration where it promotes aggregation  
503 (Bretl and Kirby, 2016), which in non-aggregative bacteria would turn off the SR (since the A-  
504 signal components serve as nutrients), the downregulation of SocE permits CgsA to keep  
505 (p)ppGpp (which is required for spore formation) elevated during development.

506 A proteolytic cleavage product of CsgA serves as another extracellular signal which is  
507 required for fruiting body development and sporulation (C-signal; (Giglio et al., 2015; Gronewold  
508 and Kaiser, 2002). The specific mechanisms by which C-signal mediates intercellular  
509 communication are not understood, but it appears to be involved in cell-to-cell adhesion and  
510 coordination of cell movement during development (Sogaard-Andersen et al., 2003) and is a key  
511 element enabling multicellular aggregation and cellular differentiation (Holmes et al., 2010;  
512 Julien et al., 2000). In addition to A- and C-signaling, at least three other signals, termed B-, D-  
513 and E-signal, mediate intercellular communication and coordination of individual cells during  
514 development, but their specific mechanisms remain unclear (Bretl and Kirby, 2016; Kaiser,  
515 2004).

516 The SR is largely conserved in bacteria where it typically mediates proliferative and  
517 biosynthetic quiescence in response to nutrient depletion and other stresses. While it is  
518 therefore likely to have been present in the unicellular ancestor of myxobacteria, the genetic  
519 novelties represented by the intracellular CsgA-SocE circuits and the extracellular A-, B-, C-, D-  
520 and E-signals co-opted this behavior to the transition to multicellularity. By making the SR cell  
521 nonautonomous, these components and their interactions form a set of rules that enable cells of  
522 *M. xanthus* to act as agents with respect to both cessation of movement and active signaling  
523 (Arias Del Angel et al., 2017). As demonstrated in other myxobacteria such as  
524 *Anaeromyxobacter dehalogenans*, and *Sorangium cellulosum*, it likely maintains aggregates  
525 and promotes the differentiation of their constituent cells into quiescent spores and other cell  
526 types (Huntley et al., 2014; Knauber et al., 2008).



527 Eukaryotic cells like those of Dictyostelium do not have a bacterial-type stringent response,  
528 but they have their own conserved sensor of nutrient depletion, the enzyme AMP-dependent  
529 protein kinase (AMPK). Among other effects, AMPK inhibits the energy utilization hub  
530 mechanistic target of rapamycin complex-1 (mTORC1) under starvation conditions (Hardie,  
531 2014). In animal systems AMPK plays developmental roles in, for example, inducing quiescence  
532 in germline stem cells (GSCs) in the nematode *Caenorhabditis elegans*. In the absence of  
533 AMPK, the GSCs overproliferate and lose their reproductive capacity, leading to sterility  
534 (Kadekar and Roy, 2019). Significantly, in relation to the discussion above of the SR in  
535 Myxobacteria quiescence, the function of AMPK in *C. elegans* development has been  
536 reconfigured evolutionarily to be cell nonautonomous, with AMPK activity in somatic cells being  
537 transmitted to GSCs via small RNAs (Kadekar and Roy, 2019). But the quiescence-inducing  
538 role of AMPK is conserved across the eukaryotes, also appearing in plants and fungi (Guerinier  
539 et al., 2013; Zhang and Cao, 2017).

540 In Dictyostelia, AMPK was found to regulate aggregate size and patterning, as well as cell  
541 fate choice and stalk-spore case boundary formation in the fruiting body (Maurya et al., 2017).  
542 Deletion of the gene specifying AMPK resulted in generation of numerous small-sized  
543 aggregates (compared to wild type cell populations) that develop asynchronously to form few  
544 fruiting bodies with small spore masses and long stalks. In contrast, when the gene is  
545 overexpressed, cells form fruiting bodies with small stalks and large spore masses (Maurya et  
546 al., 2017). Although AMPK itself functions cell autonomously, its regulation depends on  
547 interaction with other cells, mediated by soluble factors. For example, the secreted inhibitor of  
548 cell-cell adhesion Countin (Jang and Gomer, 2008) is upregulated in AMPK null cells, and  
549 conditioned media collected from them cause wild-type cells to form smaller aggregates  
550 (Maurya et al., 2017).

551 As with Myxobacteria, the starvation response triggers development at the expense of  
552 growth. Jaiswal and coworkers have shown that although in Dictyostelium, mTORC1 function is  
553 indeed inactivated via AMPK upon starvation, development is nonetheless initiated. These  
554 investigators have identified of a class of essential starvation-upregulated, developmentally  
555 associated signaling genes and downregulated growth genes (Jaiswal and Kimmel, 2019;  
556 Jaiswal et al., 2019). Based on the earlier work of Maurya et al. (2017), downregulation of the  
557 paracrine adhesion inhibitor Countin appears to be a component of this response, suggesting as  
558 with Myxobacteria, a conserved starvation-sensing mechanism may have been recruited into a  
559 mechanism of multicellular development by one or more factors that mediate communication  
560 among agent-like cells.

561

562 **OSCILLATIONS AS A BASIS FOR BOTH GENERIC AND AGENT-TYPE BEHAVIORS**

563 Both Myxobacteria and Dictyostelia exhibit intracellular oscillations, which in the first case  
564 mainly involves cell polarity and direction of motion reversals, and in the second, production of  
565 chemoattractant molecules such as cAMP. Oscillations can mediate global effects if they come  
566 into synchrony in established cell masses. This produces developmental fields in which the  
567 constituent cells acquire a uniform state in a key modulator (e.g., the transcriptional coregulator  
568 Hes1) and therefore are poised to respond to developmental signals in a coordinated fashion.  
569 This occurs in animal systems, for example during the formation of somites, tandem blocks of  
570 tissue along the central axis of vertebrates (Hubaud and Pourquié, 2014), and the digits of the  
571 tetrapod limb (Bhat et al., 2019). The synchronization of oscillators can be considered a generic  
572 physical effect since its physical basis is the same regardless of the underlying basis of the  
573 oscillation.

574 But oscillations of individual cells can also provide component of agent-like behavior,  
575 particularly in species that develop by aggregation. For example, they can permit cells to signal  
576 one another over distances provided they are specifically receptive to periodic stimulation. The  
577 myxobacterium *M. xanthus* exhibits a quasi-periodic reversal in the direction of motion. Reversal  
578 in the gliding cells are achieved by dynamic cell polarity that switches direction by 180° (Zusman  
579 et al., 2007). As noted above, regular reversals are driven by the relocalization of polarity and  
580 motility proteins between the leading and lagging poles of the cells and allow for diverse  
581 collective modes, such as rippling in nutrient-rich media (Mauriello et al., 2010; Shimkets and  
582 Kaiser, 1982). Reversals also appear to be critical for complex collective behavior before and  
583 during development (Blackhart and Zusman, 1985; Wu et al., 2009).

584 Indeed, it appears that reversal frequency in *M. xanthus* drives a phase transition from two-  
585 dimensional flocking to one-dimensional streaming, therefore modulating the complex behaviors  
586 that enable the robust formation of fruiting bodies (Thutupalli et al., 2015). Because the reversal  
587 is coupled to intercellular signaling pathways (C-signal), this periodic switch may be  
588 synchronized between different cells and favor development (Igoshin et al., 2004). A refractory  
589 period, i.e., time lag in response to the environmental signal(s), in the molecular circuit  
590 responsible for inducing the polarity reversal, has been proposed to underlie the rippling  
591 dynamics of the bacterial sheet (Guzzo et al., 2018).

592 As in Myxobacteria, oscillations mediate collective behaviors in Dictyostelia, but they are  
593 also the basis of agent-like behaviors in these social amoebae. Initially isolated cells of *D.*  
594 *discoideum* aggregate by chemotactic movements in response to the release of periodic pulses

595 of cyclic AMP, which they also amplify and relay. Specifically, when stimulated with extracellular  
596 cAMP, cells respond by synthesizing and secreting more cAMP. This results in non-dissipating  
597 waves of cAMP which guide aggregation of individual amoeboid cells (Tomchik and Devreotes,  
598 1981). The relay requires a refractory period, or else there could just be an explosive production  
599 of cAMP with no local gradients to guide cells into aggregates. So, a nonconstant, ultimately  
600 periodic, production of the chemoattractant by the dispersed cells is intrinsic to the patterning  
601 process.

602 Since the cells in this organism start out as individuals, a key question in characterizing  
603 their agent-like behavior is the relation of single cell oscillations to the global oscillations in the  
604 organizing field of cells (Nanjundiah and Wurster, 1989). Isolated cells are capable of oscillating  
605 (Sato et al., 1985), but it has been unclear whether such oscillations initiate the propagating  
606 waves in the “excitable medium” constituted by the field of cells (Cohen and Robertson, 1971;  
607 Durston, 1973). There are two physical possibilities. In the first, a set of oscillators (the  
608 amoebae in this case) with identical period, but randomly distributed phases come into  
609 synchrony or attain a spatiotemporal propagating mode through weak coupling, by a diffusible  
610 chemical, for example (Garcia-Ojalvo et al., 2004; Kuramoto, 1984; Strogatz, 2003). The second  
611 possibility is that cells only become oscillatory as a result of collective interactions, the global  
612 behavior being an emergent process. Gregor et al. (2010) investigated these possibilities  
613 experimentally and via mathematical modelling, and while they confirmed that isolated cells are  
614 capable of oscillating, they concluded that the second possibility, what they term “dynamical  
615 quorum sensing,” was the way that globally synchronized waves are generated in *Dictyostelium*.

616

## 617 **INTERPLAY OF GENERIC PROPERTIES AND AGENT EFFECTS**

618 As we have shown, aggregative multicellular systems can change their organizational states as  
619 a result of the cell masses they form being shaped and reshaped by mesoscopic physical  
620 effects, and also by lineage-specific, “custom-built” agent-like behaviors. A schematic  
621 representing some of these factors and determinants is shown in Fig. 2. In some cases,  
622 however, developmental transformations cannot be attributed to either category of effect alone  
623 but can only be understood as outcomes of a combination of the two acting in concert. A newly  
624 characterized example of this described by Hayakawa et al. (2020), in which an ordered, liquid-  
625 crystalline-like field of polarized *D. discoideum* amoebae organizes by phase separation, from  
626 populations of cells of a mutant strain incapable of chemotactic signaling via cAMP. This novel  
627 patterning phenomenon, which has generic-type features, occurs by “contact following

628 locomotion,” a behavior whose agent-type role in the collective motion is supported by  
629 simulations.

630 In the remainder of this section we will discuss two long-studied cases of such generic-  
631 agential synergy: (i) the formation and migration of multicellular slugs in dictyostelids, and (ii)  
632 formation of complex morphologies in fruiting bodies of both dictyostelids and myxobacterial  
633 species.

634

### 635 **Slug formation in Dictyostelium**

636 When starvation drives *D. discoideum* into development the liquid-like streams that form  
637 culminate in aggregation centers. The mature aggregates, slugs, migrate over the surface in  
638 response to light and temperature gradients. Inside the slug, moving cells form smooth flow  
639 patterns similar to those of individual particles in liquids (Vasiev and Weijer, 2003). The slug is a  
640 long (~1 mm), thin (~50  $\mu\text{m}$ ) cylindrical mass with a well-defined anterior tip that directs its  
641 movement. During aggregation and early slug formation presumptive stalk and spore cells are  
642 sorted out along the anterior-posterior axis, and their relative positions become inverted in a  
643 ‘reverse fountain’ manner as the fruiting body forms.

644 This process exhibits both generic mesoscopic properties but also agent-like behaviors of  
645 the constituent cells. Odell and Bonner (1986), for example, used a continuum mechanics  
646 model of viscous flow in which cells moved both longitudinally, in response to an anterior-  
647 posterior cAMP gradient and transversely, in response to an unspecified gradient, to generate a  
648 rotational movement that could generate a rolling flow. Jiang et al. (1998) employed a discrete  
649 lattice model in which movement was determined by chemotaxis towards a center (the tip) and  
650 energetics (cell-cell adhesion), and found that with the right balance of the two forces, a  
651 reasonably correct pattern of sorting out resulted. Umeda and Inouye (2004) formulated a  
652 continuum model of a viscoelastic fluid made up of heterogeneous actively moving points (cells)  
653 that differed in various respects including their diffusive tendencies and abilities to offer  
654 resistance, and obtained, in addition to sorting out, plausible equilibrium shapes for the slug.  
655 Hogeweg, Marée, and coworkers combined agent-based and generic mechanisms –  
656 chemotaxis to cyclic AMP, differential adhesion and pressure generation - to simulate the  
657 aggregation of cells, the correct spatial distribution of cell type and their self-organization into a  
658 fruiting body (Marée and Hogeweg, 2001; Marée, 2000; Marée et al., 2013; Savill and  
659 Hogeweg, 1997). Trenchard (2019) has proposed a different agent-based mechanism for  
660 sorting, one that depends on differences in speeds of movement and energetics.

661

## 662 **Fruiting body branching**

663 In contrast to *M. xanthus* and *D. discoideum* which exhibit branchless fruiting bodies, many of  
664 the species in both of their lineages develop into branched structures (Schaap et al., 2006;  
665 Yang and Higgs, 2014). In Dictyostelia, branches develop as the product of either budding or  
666 from a secondary cellular mass generated through pinching off of the main cellular mass  
667 (Schaap et al., 2006). These mechanisms can lead to different branching patterns in different  
668 species, with in some cases arrays of secondary fruiting bodies arranged about a primary axis  
669 of stalk cells (Gregg et al., 1996). In Myxobacteria, where evidence is more limited, branches  
670 seems to develop exclusively by budding of the main cellular mass; pinching off has not been  
671 reported in this group (Qualls et al., 1978). Also, regularity in the branch distribution, as  
672 observed for whorl-developing fruiting bodies in some Dictyostelia species, is not obvious.

673 Cox and co-workers have carried out detailed studies on the genesis of the branching  
674 pattern in fruiting bodies of the dictyostelid *Polysphondilium pallidum* (now *Heterostelium*  
675 *pallidum*, Sheikh et al. (2018)), and their studies point to the integrated functioning of generic  
676 and agent-like processes (reviewed in Bonner and Cox (1995). *P. pallidum*/*H. pallidum* fruiting  
677 bodies are the result of secondary cellular masses being pinched off in regular intervals from the  
678 primary cell mass as it moves upward as the main stalk is formed (Byrne and Cox, 1987). The  
679 secondary masses turn into whorls of regularly spaced branches perpendicular to the main stalk  
680 (McNally et al., 1987; McNally and Cox, 1988). As in *D. discoideum*, *P. pallidum*/*H. pallidum*  
681 elongation involves chemotactic movements towards a cAMP gradient, the source of which is a  
682 set of cells found at the tip of the cellular mass.

683 The mechanisms underlying pinching off of the secondary cellular masses remain  
684 unknown. However, since this takes place before branching, the cellular mass may still retain its  
685 liquid-like properties. Liquids may undergo pinch-off as a consequence of an imbalance of the  
686 velocities of individual subunits across the mass. If the velocities are sufficiently large, the  
687 adhesion forces will not be strong enough to keep the cellular subunits together and a (partial)  
688 pinch-off would occur. As with slug locomotion, described above, chemotaxis could induce a  
689 velocity gradient of the cells across the mass. Biased movement due to chemotaxis, along with  
690 the oscillatory intracellular dynamics, may help to explain the observed regularity in the spacing  
691 between the multiple secondary masses. This outcome, which is not trivially predicted from the  
692 generic behavior of the liquid-like primary mass, may thus depend on agent-like behavior.

693 The secondary cellular mass remains attached to the stalk and rounds up as expected for a  
694 liquid composed of homogeneously cohesive particles (McNally and Cox, 1988). Branches  
695 developed from the secondary mass are regularly arranged across the plane perpendicular to

696 the main axis. The positions of the branches are proposed to be determined by a local  
697 activation-long range inhibition effect like that described by Turing (1952), although the  
698 components of this reaction-diffusion system have not been characterized (Cox et al., 1988).

699 The mechanism of branching itself is more problematic, since it is not an expected  
700 morphology of liquid-like materials. Plant tissues, however, routinely undergo budding and  
701 branching, an effect that has been attributed to the inherent properties of their material identity  
702 as deformable solids (Benítez et al., 2018; Hernández-Hernández et al., 2012). These motifs  
703 are independently recurrent developmental outcomes in all lineages of photosynthetic  
704 eukaryotes, including the various polyphyletic algal clades and the monophyletic land plant  
705 clade, the embryophytes (Hernández-Hernández et al., 2012). Since both Dictyostelia and  
706 Myxobacteria undergo solidification via ECM deposition and possibly liquid-to-solid jamming in  
707 portions of the multicellular mass after aggregation has been completed, this might allow the  
708 multicellular masses to escape from the physical constraints imposed by the liquid-like behavior  
709 and acquire the properties of deformable solids for which budding and branching are easily  
710 achievable.

711 In addition to the transition from a liquid-like behavior to a solid one, a differential increase  
712 of volume in the direction of the future branch is required to extrude from the main cellular mass  
713 a secondary mass that will bud and finally turn into a mature branch. In plants, this is achieved  
714 by localized cell proliferation in response to gradients of hormones (Benkova and Bielach, 2010;  
715 Vermeer and Geldner, 2015). In Myxobacteria and Dictyostelia, development proceeds with  
716 little, if any, cell division. One of two mechanisms, or a combination of them, might cause the  
717 required increment in volume: further deposition of ECM or expansion of individual cell volume.  
718 In either case, volume increase must occur in an irregular distribution over the mass, with foci of  
719 hyperplasia specifying the sites where branches will develop further.

720 While some myxobacterial species also have branched fruiting bodies (see, e.g., Zhang et  
721 al. (2003)), the lack of conventional chemotaxis (although see Taylor and Welch (2008) for a  
722 chemotaxis-like effect in these organisms) and molecular networks for local activation-long  
723 range inhibition may account for pinch-off and regular patterning in branching, respectively, not  
724 being observed during fruiting morphogenesis in Myxobacteria. It should be noted that fruiting  
725 bodies in these species grow vertically in a series of tiers, each involving the addition of a cell  
726 monolayer. The rate of formation of new tiers is too rapid to be attributed to cell division, which  
727 suggests that cells may be recruited from lower layers (Copenhagen et al., 2020; Curtis et al.,  
728 2007). This mechanism for vertical growth is robust in the face of diverse mutations and  
729 conditions, which suggest that it is an essential process in fruiting body morphogenesis (Curtis

730 et al., 2007). Since it has been reported that the deposition of tiers can be slightly asymmetrical  
731 (Curtis et al., 2007), it is possible that branching in Myxobacteria arises from the amplification  
732 and robust reinstatement of such asymmetries across generations.

733

## 734 **DISCUSSION**

735 Motivated by the parallelisms between the two major known lineages of multicellular  
736 aggregative organisms: the prokaryotic myxobacteria and the eukaryotic dictyostelids, we have  
737 reviewed the factors determining the main developmental events in these organisms. We  
738 suggest that as a consequence of cell-cell contact during aggregation, the nascent multicellular  
739 masses of each organism acquire liquid-like properties and thereby become subject to  
740 morphogenetic processes characteristic of such materials. This allows them to be studied, and  
741 in some respects explained, in terms of physical principles at the mesoscale. As expected from  
742 the physical theory, the cell aggregates can exhibit streaming, rippling, and rounding-up  
743 behaviors like those observed in non-living liquids.

744 While the molecules that mediate liquid-type properties in the two classes of organisms are  
745 largely different, the physical processes mobilized at the multicellular scale are generic and in  
746 that sense are the “same.” Furthermore, later in development cellular masses solidify and  
747 behave as deformable solids, another category of material with nonliving counterparts with  
748 generic properties. For such materials, branching is a predictable morphological outcome.

749 Although the behaviors in aggregating cells resemble those exhibited by non-living liquids,  
750 mathematical and computational models have also needed to include agent-based behaviors in  
751 addition to generic ones to achieve verisimilitude (Cotter et al., 2017; Fujimori et al., 2019;  
752 Janulevicius et al., 2015; Marée and Hogeweg, 2001). Unlike the molecular subunits of  
753 nonliving liquids, the cells constituting the multicellular masses can change and adapt their  
754 behaviors in response to external cues through complex regulatory and signaling pathways. We  
755 attribute the deviations of the dynamics and morphological outcomes of the multicellular masses  
756 from generic physical predictions to the contribution of agent-like behaviors, e.g., directed  
757 migration, regulated quiescence, oscillatory signal relay, reaction-diffusion coupling, of the cells  
758 themselves. Cells of clonally developing multicellular organisms can also exhibit agent-like  
759 behaviors (Christley et al., 2007; Giniunaite et al., 2020b; McLennan et al., 2020). While it is  
760 difficult to quantify the relative contributions that each class of phenomena makes to the  
761 respective developmental processes, considering the extent to which morphogenetic outcomes  
762 are predictable from generic physical considerations we suggest that morphogenesis of

763 Myxobacteria and Dictyostelia is more dependent on agent-like behaviors than that of animals  
764 or plants. This is almost certainly a function of their aggregative nature.

765 Because of the relative indifference of generic processes to molecular variation (adhesion,  
766 for example, can be mediated by many different classes of proteins and glycans), the gene  
767 products that first mediated the production of a form or structure in a species' earliest ancestors  
768 need not be the same one that is active in its present members. Consequently, the gene  
769 products that mobilize generic effects can differ widely in different classes of organisms (e.g.,  
770 animals, plants, social amoebae and bacteria), and even in sister species, due to developmental  
771 system drift (True and Haag, 2001). In contrast, generic processes are part of the physical  
772 world, and therefore do not evolve per se, although the physics involved in a given lineage's  
773 developmental routines can change over phylogeny (Newman, 2019a).

774 Many of the genes involved in generic processes in animal and plant lineages predated or  
775 accompanied the emergence of multicellularity. In those lineages, morphogenesis and pattern  
776 formation can be characterized in terms of the dynamical patterning modules (DPMs) that  
777 mobilize specific physical forces and physicochemical effects to produce the respective  
778 structural motifs (Newman, 2019b; Hernández-Hernández, 2012; Benítez et al., 2018). Similarly,  
779 some gene products that shape dictyostelids and myxobacteria as multicellular materials were  
780 carried over from single-celled ancestors, as were some gene products involved in agent  
781 behaviors. However, as we have described with the *M. xanthus* stringent response suppressive  
782 products CsgA and SocE, and the *D. discoideum* starvation-regulated paracrine factor Countin,  
783 some agent-associated genes seem to be novelties of the social forms.

784 While DPMs are, by definition intrinsically multicellular, agents are intrinsically individual –  
785 cellular, in the cases discussed here. Another important distinction is that agents are peculiar to  
786 the biological world, even if they are artifactual (e.g., robots). Thus, in contrast to generic  
787 materials, which have physically predictable macroscopic properties and behaviors, cellular  
788 agents have no such constraints on their activities. The rules they follow in developmental  
789 systems are as varied as cell behaviors (e.g., motility, secretion of ions, small and macro-  
790 molecules, electrical, chemical, and mechanical excitability) and responses to  
791 microenvironmental complexity permit.

792 Early comparisons between Myxobacteria and Dictyostelia noted that the morphological  
793 outcomes of their respective developmental processes resembled one another to a remarkable  
794 extent despite their independent origins, the evolutionary distance between them, and the lack  
795 of gene-based homology in the relevant mechanisms in the two groups. Our attention to this  
796 phenomenon was inspired by comparative analysis of the two lineages by Bonner (1982) and



797 Kaiser (1986). Both favored explanations based on convergent selection for adaptation to  
798 similar ecological niches, with a focus on common developmental mechanisms such as cell  
799 adhesion, communication and oscillations (Kaiser, 1986) and “developmental constraints” such  
800 as that incurred by increased size (Bonner, 1982; Bonner, 2015). Based on the literature  
801 reviewed here, we conclude that the similar developmental trajectories and outcomes of  
802 Myxobacteria and Dictyostelia are more likely due to shared generic physical processes in  
803 coordination with analogous agent-type behaviors than to convergent evolution under parallel  
804 natural selection regimes. However, we acknowledge, in agreement with both Kaiser (1986) and  
805 Bonner (2015), that ecology, in the form of exploitation or construction of suitable environmental  
806 niches, is an essential factor in accounting for the establishment of these social phenotypes.  
807 Our analysis extends beyond the molecular mechanisms considered by these earlier  
808 investigators, to also include the physical nature of the multicellular masses. This approach is  
809 based on experimental and theoretical advances made in material sciences, particularly as  
810 applied to biological systems, in the intervening decades (see Forgacs and Newman (2005)),  
811 and progress in agent-based concepts and models (Thorne et al., 2007).

812 Some authors have noted the tendency of aggregative multicellular organisms to exhibit a  
813 narrower and simpler morphological diversity when compared to clonal organisms such as  
814 animals and plants (Grosberg and Strathmann, 2007). A common explanation to this  
815 observation is the emergence of genetic conflict arising between different cellular lineages being  
816 incorporated into the same conglomerate during aggregation. Despite kin selection mechanisms  
817 of “cheater” control (Travisano and Velicer, 2004), it is held that the impact of genetic conflict  
818 could still be large enough to destabilize multicellular structure and impair the evolution of  
819 further complexity. In clonal organisms, genetic conflict is thought to be avoided at every  
820 generation by genetic bottlenecks that reduce genetic diversity to those mutations emerging as  
821 consequence of DNA replication (Folse and Roughgarden, 2010). In his treatment of the  
822 evolution of Dictyostelia, Bonner (1982) also suggested that selective regimens are dependent  
823 on the scale on which they operate, and that size contributes to the differences in diversity  
824 between Dictyostelia and Myxobacteria compared with plants and animals.

825 The physical framework addressed here provides an alternative to the multilevel selection  
826 and scale-based accounts. As described above, despite the fact that animals, Dictyostelia and  
827 Myxobacteria can all be conceptualized as non-living liquids, the weaker associations between  
828 cells and surfaces in the social amoebae and bacteria lead to behaviors not observed in animals  
829 (e.g., streaming) and the stronger, cytoskeletally linked attachments in animals mediate  
830 behaviors (multilayering and lumen formation) not seen in the aggregative systems (Newman,

831 2019c). These differences are amplified by the fact that polarity (affecting, variously cell surface  
832 or shape in the different systems) is much more transient in Dictyostelia and Myxobacteria than  
833 in animals (Gómez-Santos et al., 2019; Manahan et al., 2004; Szadkowski et al., 2019),  
834 undermining the persistence of complex organization in the former two groups.

835 An important implication of the perspective we have presented here is that physics-based  
836 and agent-based approaches to understanding development are not simply alternative modeling  
837 or computational strategies, but represent realities of complex biological systems that are  
838 represented to various extents in different organismal lineages. Thus, the material nature of  
839 multicellular systems and the inherent structural motifs entailed by the relevant physics  
840 introduces a predictability to morphological evolution (Newman, 2016; Newman, 2019b). In  
841 contrast, agent-type behaviors are more unconstrained and open-ended in their possibilities,  
842 and their evolution could have led phylogenetic lineages that embody them (e.g., vertebrates,  
843 which have the novelty of a neural crest (York and McCauley (2020)) in less predictable  
844 directions.

845 Comparative analyses often rely on the study of homologous characters (i.e., those sharing  
846 common ancestry) in order to disentangle phylogenetic relationships and hypothesize  
847 evolutionary scenarios. These studies, mostly conducted in the population genetics framework  
848 underlying the evolutionary Modern Synthesis, have provided important insights regarding the  
849 processes of divergence of species as the product of selective pressures, genetic drift, mutation  
850 and gene flow (Pigliucci and Müller, 2010). But (with some exceptions, see Abouheif and Wray  
851 (2002)) they have generally neglected the role of development and, lacking a mechanistic view  
852 of phenotypic innovation (Müller and Newman, 2005), are limited in the extent to which  
853 homology can be assigned between characters in disparate groups (Müller, 2003; Müller, 2017).

854 Structures are considered homologous developmentally if they have the same form by virtue  
855 of having the same generative processes. Here we have invoked a more general sense of this  
856 concept, including in the notion of “sameness” generic physical mechanisms in addition to  
857 genes. In this we are echoing the insights of the Soviet biologist N.I. Vavilov, who in his classic  
858 paper “The law of homologous series in variation” wrote, “[g]enetical studies of the last decades  
859 have proved even the divisibility of the minutest morphological and physiological units in  
860 systematics...and established that, although outwardly similar, they can be different  
861 genotypically” (p. 48), and that “the great majority of varietal characters, not only within the limits  
862 of single genera and families but even in distant families, are homologous from a morphological  
863 point of view” (p 82) (Vavilov, 1922). We suggest that our broader concept of homology can help  
864 resolve enigmas of biological similarity across phylogenetic distances. Knowledge of molecular

865 and cellular determinants of material identity and agent-like behaviors, in concert with suitable  
866 mathematical and computational models of these causally hybrid, multiscale systems (e.g.,  
867 (Camley and Rappel, 2017; Cotter et al., 2017)), could ultimately provide a compelling and  
868 testable account of these morphological affinities.

869

870

## 871 **Acknowledgments**

872

873 This paper is dedicated to the memory of our student and colleague, Juan Arias Del Angel. Juan  
874 framed the questions that led to this paper and wrote the first draft during a study visit to the  
875 SAN's laboratory in the summer of 2019. Juan was supported by a Consejo Nacional de Ciencia  
876 y Tecnología (CONACYT) scholarship and was a recipient of a Company of Biologists (U.K.)  
877 traveling fellowship during his work on this project. His completed Ph.D. thesis in the Programa  
878 de Doctorado en Ciencias Biomédicas Universidad Nacional Autónoma de México, based on  
879 work cited herein, was submitted after his untimely death in November. We thank Sue Seif for  
880 drawing Figure 1 and Luis Guillermo García Jácome for drawing Figure 2.

## 881 References

- 882 **Abouheif, E. and Wray, G. A.** (2002). Evolution of the gene network underlying wing  
883 polyphenism in ants. *Science* **297**, 249-252.
- 884 **Arias Del Angel, J. A., Escalante, A. E., Martínez-Castilla, L. P. and Benitez, M.** (2017). An  
885 evo-devo perspective on multicellular development of Myxobacteria. *J Exp Zool B Mol*  
886 *Dev Evol* **328**, 165-178.
- 887 **Arnold, J. W. and Shimkets, L. J.** (1988). Cell surface properties correlated with cohesion in  
888 *Myxococcus xanthus*. *J Bacteriol* **170**, 5771-5777.
- 889 **Arnoult, D., Tatischeff, I., Estaquier, J., Girard, M., Sureau, F., Tissier, J. P., Grodet, A.,**  
890 **Dellinger, M., Traincard, F., Kahn, A., et al.** (2001). On the evolutionary conservation  
891 of the cell death pathway: mitochondrial release of an apoptosis-inducing factor during  
892 *Dictyostelium discoideum* cell death. *Mol Biol Cell* **12**, 3016-3030.
- 893 **Asally, M., Kittisopikul, M., Rue, P., Du, Y., Hu, Z., Cagatay, T., Robinson, A. B., Lu, H.,**  
894 **Garcia-Ojalvo, J. and Suel, G. M.** (2012). Localized cell death focuses mechanical  
895 forces during 3D patterning in a biofilm. *Proc Natl Acad Sci U S A* **109**, 18891-18896.
- 896 **Bahar, F., Pratt-Szeliga, P. C., Angus, S., Guo, J. and Welch, R. D.** (2014). Describing  
897 *Myxococcus xanthus* aggregation using Ostwald ripening equations for thin liquid films.  
898 *Sci Rep* **4**, 6376.
- 899 **Behmlander, R. M. and Dworkin, M.** (1994a). Biochemical and structural analyses of the  
900 extracellular matrix fibrils of *Myxococcus xanthus*. *J Bacteriol* **176**, 6295-6303.
- 901 ---- (1994b). Integral proteins of the extracellular matrix fibrils of *Myxococcus xanthus*. *J*  
902 *Bacteriol* **176**, 6304-6311.
- 903 **Benítez, M., Hernández-Hernández, V., Newman, S. A. and Niklas, K. J.** (2018). Dynamical  
904 patterning modules, biogeneric materials, and the evolution of multicellular plants. *Front*  
905 *Plant Sci* **9**, 871.
- 906 **Benkova, E. and Bielach, A.** (2010). Lateral root organogenesis - from cell to organ. *Curr Opin*  
907 *Plant Biol* **13**, 677-683.
- 908 **Bhat, R., Glimm, T., Linde-Medina, M., Cui, C. and Newman, S. A.** (2019). Synchronization  
909 of Hes1 oscillations coordinates and refines condensation formation and patterning of the  
910 avian limb skeleton. *Mech Dev* **156**, 41-54.
- 911 **Bi, D., Zhang, J., Chakraborty, B. and Behringer, R. P.** (2011). Jamming by shear. *Nature*  
912 **480**, 355-358.
- 913 **Blackhart, B. D. and Zusman, D. R.** (1985). "Frizzy" genes of *Myxococcus xanthus* are  
914 involved in control of frequency of reversal of gliding motility. *Proc Natl Acad Sci U S A*  
915 **82**, 8767-8770.
- 916 **Bonner, J. T.** (1982). Evolutionary strategies and developmental constraints in the cellular slime  
917 molds. *The American Naturalist* **119**, 530-552.
- 918 **Bonner, J. T.** (1993). *Life cycles*. Princeton: Princeton University Press.
- 919 **Bonner, J. T.** (1998). The origins of multicellularity. *Integrative Biology* **1**, 27-36.
- 920 **Bonner, J. T.** (2009). *The social amoebae: the biology of cellular slime molds*. Princeton:  
921 Princeton University Press.
- 922 ---- (2015). The evolution of evolution: seen through the eyes of a slime mold. *BioScience* **65**,  
923 1184-1187.
- 924 **Bonner, J. T. and Cox, E. C.** (1995). Pattern formation in dictyostelids. *Seminars in*  
925 *Developmental Biology* **6**, 359-368.

- 926 **Boutte, C. C. and Crosson, S.** (2013). Bacterial lifestyle shapes stringent response activation.  
927 *Trends Microbiol* **21**, 174-180.
- 928 **Boynton, T. O., McMurry, J. L. and Shimkets, L. J.** (2013). Characterization of *Myxococcus*  
929 *xanthus* MazF and implications for a new point of regulation. *Mol Microbiol* **87**, 1267-  
930 1276.
- 931 **Bretl, D. J. and Kirby, J. R.** (2016). Molecular Mechanisms of Signaling in *Myxococcus*  
932 *xanthus* Development. *J Mol Biol* **428**, 3805-3830.
- 933 **Bretschneider, T., Othmer, H. G. and Weijer, C. J.** (2016). Progress and perspectives in  
934 signal transduction, actin dynamics, and movement at the cell and tissue level: lessons  
935 from *Dictyostelium*. *Interface Focus* **6**, 20160047.
- 936 **Brown, M. W. and Silberman, J. D.** (2013). The non-dictyostelid sorocarpic amoebae. In  
937 *Dictyostelids. evolution, genomics and cell biology* (ed. M. Romeralo, B. S. & R.  
938 Escalante), pp. 219-242. Heidelberg, Germany: Springer.
- 939 **Byrne, G. and Cox, E. C.** (1987). Genesis of a spatial pattern in the cellular slime mold  
940 *Polysphondylium pallidum*. *Proc Natl Acad Sci U S A* **84**, 4140-4144.
- 941 **Cabello, F. C., Godfrey, H. P., Bugrysheva, J. V. and Newman, S. A.** (2017). Sleeper cells:  
942 the stringent response and persistence in the *Borrelia* (*Borrelia*) *burgdorferi* enzootic  
943 cycle. *Environ Microbiol* **19**, 3846-3862.
- 944 **Camley, B. A. and Rappel, W. J.** (2017). Physical models of collective cell motility: from cell  
945 to tissue. *J Phys D Appl Phys* **50**.
- 946 **Chatterji, D. and Ojha, A. K.** (2001). Revisiting the stringent response, ppGpp and starvation  
947 signaling. *Curr Opin Microbiol* **4**, 160-165.
- 948 **Chopra, A. and Nanjundiah, V.** (2013). The precision with which single cells of *Dictyostelium*  
949 *discoideum* can locate a source of cyclic AMP. *Chaos, Solitons & Fractals* **50**, 3-12.
- 950 **Christley, S., Alber, M. S. and Newman, S. A.** (2007). Patterns of mesenchymal condensation  
951 in a multiscale, discrete stochastic model. *PLoS Comput Biol* **3**, (e76) 0743-0753.
- 952 **Coates, J. C. and Harwood, A. J.** (2001). Cell-cell adhesion and signal transduction during  
953 *Dictyostelium* development. *J Cell Sci* **114**, 4349-4358.
- 954 **Cohen, M. H. and Robertson, A.** (1971). Wave propagation in the early stages of aggregation  
955 of cellular slime molds. *J Theor Biol* **31**, 101-118.
- 956 **Copenhagen, K., Alert, R., Wingreen, N. S. and Shaevitz, J. W.** (2020). Topological defects  
957 induce layer formation in *Myxococcus xanthus* colonies. *arXiv.org*, arXiv:2001.03804.
- 958 **Cornillon, S., Foa, C., Davoust, J., Buonavista, N., Gross, J. D. and Golstein, P.** (1994).  
959 Programmed cell death in *Dictyostelium*. *J Cell Sci* **107** ( Pt 10), 2691-2704.
- 960 **Cotter, C. R., Schuttler, H. B., Igoshin, O. A. and Shimkets, L. J.** (2017). Data-driven  
961 modeling reveals cell behaviors controlling self-organization during *Myxococcus xanthus*  
962 development. *Proc Natl Acad Sci U S A* **114**, E4592-E4601.
- 963 **Cox, E. C., Spiegel, F. W., Byrne, G., McNally, J. W. and Eisenbud, L.** (1988). Spatial  
964 patterns in the fruiting bodies of the cellular slime mold *Polysphondylium pallidum*.  
965 *Differentiation* **38**, 73-81.
- 966 **Crawford, E. W., Jr. and Shimkets, L. J.** (2000a). The *Myxococcus xanthus* *socE* and *csgA*  
967 genes are regulated by the stringent response. *Mol Microbiol* **37**, 788-799.
- 968 ---- (2000b). The stringent response in *Myxococcus xanthus* is regulated by *SocE* and the *CsgA*  
969 C-signaling protein. *Genes Dev* **14**, 483-492.
- 970 **Curtis, P. D., Taylor, R. G., Welch, R. D. and Shimkets, L. J.** (2007). Spatial organization of  
971 *Myxococcus xanthus* during fruiting body formation. *J Bacteriol* **189**, 9126-9130.

- 972 **de Chastellier, C. and Ryter, A.** (1977). Changes of the cell surface and of the digestive  
973 apparatus of Dictyostelium discoideum during the starvation period triggering  
974 aggregation. *J Cell Biol* **75**, 218-236.
- 975 **Dickinson, D. J., Nelson, W. J. and Weis, W. I.** (2012). An epithelial tissue in Dictyostelium  
976 challenges the traditional origin of metazoan multicellularity. *Bioessays* **34**, 833-840.
- 977 **Durston, A. J.** (1973). Dictyostelium discoideum aggregation fields as excitable media. *J Theor*  
978 *Biol* **42**, 483-504.
- 979 **Faure, L. M., Fiche, J. B., Espinosa, L., Ducret, A., Anantharaman, V., Luciano, J.,**  
980 **Lhospice, S., Islam, S. T., Treguier, J., Sotes, M., et al.** (2016). The mechanism of  
981 force transmission at bacterial focal adhesion complexes. *Nature* **539**, 530-535.
- 982 **Fisher, R. M., Shik, J. Z. and Boomsma, J. J.** (2019). The evolution of multicellular  
983 complexity: the role of relatedness and environmental constraints. In *bioRxiv*.
- 984 **Folse, H. J., 3rd and Roughgarden, J.** (2010). What is an individual organism? A multilevel  
985 selection perspective. *Q Rev Biol* **85**, 447-472.
- 986 **Forgacs, G. and Newman, S. A.** (2005). *Biological physics of the developing embryo*.  
987 Cambridge: Cambridge Univ. Press.
- 988 **Fujimori, T., Nakajima, A., Shimada, N. and Sawai, S.** (2019). Tissue self-organization based  
989 on collective cell migration by contact activation of locomotion and chemotaxis. *Proc*  
990 *Natl Acad Sci U S A* **116**, 4291-4296.
- 991 **Fukui, Y.** (2002). Mechanistics of amoeboid locomotion: signal to forces. *Cell Biol Int* **26**, 933-  
992 944.
- 993 **Fukujin, F., Nakajima, A., Shimada, N. and Sawai, S.** (2016). Self-organization of  
994 chemoattractant waves in Dictyostelium depends on F-actin and cell-substrate adhesion. *J*  
995 *R Soc Interface* **13**.
- 996 **Furusawa, C. and Kaneko, K.** (2002). Origin of multicellular organisms as an inevitable  
997 consequence of dynamical systems. *Anat Rec* **268**, 327-342.
- 998 **Garcia-Ojalvo, J., Elowitz, M. B. and Strogatz, S. H.** (2004). Modeling a synthetic  
999 multicellular clock: repressilators coupled by quorum sensing. *Proc Natl Acad Sci U S A*  
1000 **101**, 10955-10960.
- 1001 **Giglio, K. M., Zhu, C., Klunder, C., Kummer, S. and Garza, A. G.** (2015). The enhancer  
1002 binding protein Nla6 regulates developmental genes that are important for Myxococcus  
1003 xanthus sporulation. *J Bacteriol* **197**, 1276-1287.
- 1004 **Giniunaite, R., Baker, R. E., Kulesa, P. M. and Maini, P. K.** (2020a). Modelling collective  
1005 cell migration: neural crest as a model paradigm. *J Math Biol* **80**, 481-504.
- 1006 **Giniunaite, R., McLennan, R., McKinney, M. C., Baker, R. E., Kulesa, P. M. and Maini, P.**  
1007 **K.** (2020b). An interdisciplinary approach to investigate collective cell migration in  
1008 neural crest. *Dev Dyn* **249**, 270-280.
- 1009 **Gloag, E. S., Turnbull, L., Javed, M. A., Wang, H., Gee, M. L., Wade, S. A. and**  
1010 **Whitchurch, C. B.** (2016). Stigmergy co-ordinates multicellular collective behaviours  
1011 during Myxococcus xanthus surface migration. *Sci Rep* **6**, 26005.
- 1012 **Gómez-Santos, N., Glatzer, T., Koebnik, R., Swiatek-Polatynska, M. A. and Sogaard-**  
1013 **Andersen, L.** (2019). A TonB-dependent transporter is required for secretion of protease  
1014 PopC across the bacterial outer membrane. *Nat Commun* **10**, 1360.
- 1015 **Gregg, K., Carrin, I. and Cox, E. C.** (1996). Positional information and whorl morphogenesis  
1016 in Polysphondylium. *Dev Biol* **180**, 511-518.

- 1017 **Gregor, T., Fujimoto, K., Masaki, N. and Sawai, S.** (2010). The onset of collective behavior in  
1018 social amoebae. *Science* **328**, 1021-1025.
- 1019 **Gronewold, T. M. and Kaiser, D.** (2002). act operon control of developmental gene expression  
1020 in *Myxococcus xanthus*. *J Bacteriol* **184**, 1172-1179.
- 1021 **Grosberg, R. K. and Strathmann, R.** (2007). The evolution of multicellularity: a minor major  
1022 transition? *Annu. Rev. Ecol. Evol. Syst.* **38**, 621-654.
- 1023 **Guerinier, T., Millan, L., Crozet, P., Oury, C., Rey, F., Valot, B., Mathieu, C., Vidal, J.,  
1024 Hodges, M., Thomas, M., et al.** (2013). Phosphorylation of p27(KIP1) homologs KRP6  
1025 and 7 by SNF1-related protein kinase-1 links plant energy homeostasis and cell  
1026 proliferation. *Plant J* **75**, 515-525.
- 1027 **Guzzo, M., Murray, S. M., Martineau, E., Lhospice, S., Baronian, G., My, L., Zhang, Y.,  
1028 Espinosa, L., Vincentelli, R., Bratton, B. P., et al.** (2018). A gated relaxation oscillator  
1029 mediated by FrzX controls morphogenetic movements in *Myxococcus xanthus*. *Nat*  
1030 *Microbiol* **3**, 948-959.
- 1031 **Hamant, O., Bhat, R., Nanjundiah, V. and Newman, S. A.** (2019). Does resource availability  
1032 help determine the evolutionary route to multicellularity? *Evol Dev* **21**, 115-119.
- 1033 **Hardie, D. G.** (2014). AMPK--sensing energy while talking to other signaling pathways. *Cell*  
1034 *Metab* **20**, 939-952.
- 1035 **Hashimura, H., Morimoto, Y. V., Yasui, M. and Ueda, M.** (2019). Collective cell migration of  
1036 *Dictyostelium* without cAMP oscillations at multicellular stages. *Commun Biol* **2**, 34.
- 1037 **Hayakawa, M., Hiraiwa, T., Wada, Y., Kuwayama, H. and Shibata, T.** (2020). Polar pattern  
1038 formation induced by contact following locomotion in a multicellular system. *Elife* **9**.
- 1039 **Hernández-Hernández, V., Niklas, K. J., Newman, S. A. and Benítez, M.** (2012). Dynamical  
1040 patterning modules in plant development and evolution. *Int J Dev Biol* **56**, 661-674.
- 1041 **Holmes, A. B., Kalvala, S. and Whitworth, D. E.** (2010). Spatial simulations of myxobacterial  
1042 development. *PLoS Comput Biol* **6**, e1000686.
- 1043 **Hu, W., Li, L., Sharma, S., Wang, J., McHardy, I., Lux, R., Yang, Z., He, X., Gimzewski, J.  
1044 K., Li, Y., et al.** (2012). DNA builds and strengthens the extracellular matrix in  
1045 *Myxococcus xanthus* biofilms by interacting with exopolysaccharides. *PLoS One* **7**,  
1046 e51905.
- 1047 **Hubaud, A. and Pourquié, O.** (2014). Signalling dynamics in vertebrate segmentation. *Nat Rev*  
1048 *Mol Cell Biol* **15**, 709-721.
- 1049 **Huber, R. J. and O'Day, D. H.** (2017). Extracellular matrix dynamics and functions in the  
1050 social amoeba *Dictyostelium*: A critical review. *Biochim Biophys Acta Gen Subj* **1861**,  
1051 2971-2980.
- 1052 **Huntley, S., Wuichet, K. and Sogaard-Andersen, L.** (2014). Genome evolution and content in  
1053 the myxobacteria, In: editors. . p 30–50. . In *Myxobacteria: Genomics, cellular and*  
1054 *molecular biology* (ed. Z. Yang & P. I. Higgs). Norfolk, U.K.: Caister Academic Press.
- 1055 **Igoshin, O. A., Goldbeter, A., Kaiser, D. and Oster, G.** (2004). A biochemical oscillator  
1056 explains several aspects of *Myxococcus xanthus* behavior during development. *Proc Natl*  
1057 *Acad Sci U S A* **101**, 15760-15765.
- 1058 **Jaiswal, P. and Kimmel, A. R.** (2019). mTORC1/AMPK responses define a core gene set for  
1059 developmental cell fate switching. *BMC Biol* **17**, 58.
- 1060 **Jaiswal, P., Majithia, A. R., Rosel, D., Liao, X. H., Khurana, T. and Kimmel, A. R.** (2019).  
1061 Integrated actions of mTOR complexes 1 and 2 for growth and development of  
1062 *Dictyostelium*. *Int J Dev Biol* **63**, 521-527.

- 1063 **Janulevicius, A., van Loosdrecht, M. and Picioreanu, C.** (2015). Short-range guiding can  
1064 result in the formation of circular aggregates in myxobacteria populations. *PLoS Comput*  
1065 *Biol* **11**, e1004213.
- 1066 **Jiang, Y., Levine, H. and Glazier, J.** (1998). Possible cooperation of differential adhesion and  
1067 chemotaxis in mound formation of Dictyostelium. *Biophys J* **75**, 2615-2625.
- 1068 **Julien, B., Kaiser, A. D. and Garza, A.** (2000). Spatial control of cell differentiation in  
1069 Myxococcus xanthus. *Proc Natl Acad Sci U S A* **97**, 9098-9103.
- 1070 **Kadekar, P. and Roy, R.** (2019). AMPK regulates germline stem cell quiescence and integrity  
1071 through an endogenous small RNA pathway. *PLoS Biol* **17**, e3000309.
- 1072 **Kaiser, D.** (1986). Control of multicellular development: Dictyostelium and Myxococcus. *Annu*  
1073 *Rev Genet* **20**, 539-566.
- 1074 ---- (2004). Signaling in myxobacteria. *Annu Rev Microbiol* **58**, 75-98.
- 1075 **Kawli, T., Venkatesh, B. R., Kennady, P. K., Pande, G. and Nanjundiah, V.** (2002).  
1076 Correlates of developmental cell death in Dictyostelium discoideum. *Differentiation* **70**,  
1077 272-281.
- 1078 **Kawli, T. S. and Kaushik, S.** (2001). Cell fate choice and social evolution in Dictyostelium  
1079 discoideum: interplay of morphogens and heterogeneities. *J Biosci* **26**, 130-133.
- 1080 **Keating, M. T. and Bonner, J. T.** (1977). Negative chemotaxis in cellular slime molds. *J*  
1081 *Bacteriol* **130**, 144-147.
- 1082 **Knauber, T., Doss, S. D., Gerth, K., Perlova, O., Muller, R. and Treuner-Lange, A.** (2008).  
1083 Mutation in the rel gene of Sorangium cellulosum affects morphological and  
1084 physiological differentiation. *Mol Microbiol* **69**, 254-266.
- 1085 **Kuramoto, Y.** (1984). *Chemical oscillations, waves, and turbulence*. Berlin ; New York:  
1086 Springer-Verlag.
- 1087 **Kuspa, A., Plamann, L. and Kaiser, D.** (1992). A-signalling and the cell density requirement  
1088 for Myxococcus xanthus development. *J Bacteriol* **174**, 7360-7369.
- 1089 **Lin, Z., Sriskanthadevan, S., Huang, H., Siu, C. H. and Yang, D.** (2006). Solution structures  
1090 of the adhesion molecule DdCAD-1 reveal new insights into Ca(2+)-dependent cell-cell  
1091 adhesion. *Nat Struct Mol Biol* **13**, 1016-1022.
- 1092 **Liu, G., Patch, A., Bahar, F., Yllanes, D., Welch, R. D., Marchetti, M. C., Thutupalli, S. and**  
1093 **Shaevitz, J. W.** (2019). Self-Driven Phase Transitions Drive Myxococcus xanthus  
1094 Fruiting Body Formation. *Phys Rev Lett* **122**, 248102.
- 1095 **Manahan, C. L., Iglesias, P. A., Long, Y. and Devreotes, P. N.** (2004). Chemoattractant  
1096 signaling in dictyostelium discoideum. *Annu Rev Cell Dev Biol* **20**, 223-253.
- 1097 **Manoil, C. and Kaiser, D.** (1980a). Accumulation of guanosine tetraphosphate and guanosine  
1098 pentaphosphate in Myxococcus xanthus during starvation and myxospore formation. *J*  
1099 *Bacteriol* **141**, 297-304.
- 1100 ---- (1980b). Guanosine pentaphosphate and guanosine tetraphosphate accumulation and  
1101 induction of Myxococcus xanthus fruiting body development. *J Bacteriol* **141**, 305-315.
- 1102 **Marée, A. F. and Hogeweg, P.** (2001). How amoeboids self-organize into a fruiting body:  
1103 multicellular coordination in Dictyostelium discoideum. *Proc Natl Acad Sci U S A* **98**,  
1104 3879-3883.
- 1105 **Marée, A. F. M.** (2000). From pattern formation to morphogenesis. multicellular coordination in  
1106 Dictyostelium discoideum. University of Utrecht.
- 1107 **Marée, A. F. M., Hogeweg, P. and Savill, N. J.** (2013). Dictyostelium discoidum as simulated  
1108 by Marée, Hogeweg and Savill. YouTube.



- 1109 **Matsukuma, S. and Durston, A. J.** (1979). Chemotactic cell sorting in Dictyostelium  
1110 discoideum. *J Embryol Exp Morphol* **50**, 243-251.
- 1111 **Mauriello, E. M., Mignot, T., Yang, Z. and Zusman, D. R.** (2010). Gliding motility revisited:  
1112 how do the myxobacteria move without flagella? *Microbiol Mol Biol Rev* **74**, 229-249.
- 1113 **Maurya, R., Kumar, R. and Saran, S.** (2017). Dictyostelium AMPK $\alpha$  regulates aggregate  
1114 size and cell-type patterning. *Open Biol* **7**.
- 1115 **Maynard Smith, J. and Szathmáry, E.** (1995). *The major transitions in evolution*. Oxford ;  
1116 New York: W.H. Freeman Spektrum.
- 1117 **McLennan, R., McKinney, M. C., Teddy, J. M., Morrison, J. A., Kasemeier-Kulesa, J. C.,**  
1118 **Ridenour, D. A., Manthe, C. A., Giniunaite, R., Robinson, M., Baker, R. E., et al.**  
1119 (2020). Neural crest cells bulldoze through the microenvironment using Aquaporin 1 to  
1120 stabilize filopodia. *Development* **147**.
- 1121 **McNally, J. G., Byrne, G. and Cox, E. C.** (1987). Branching in Polysphondylium whorls: Two-  
1122 dimensional patterning in a three-dimensional system. *Developmental Biology* **119**, 302-  
1123 304.
- 1124 **McNally, J. G. and Cox, E. C.** (1988). Geometry and spatial patterns in Polysphondylium  
1125 pallidum. *Dev Genet* **9**, 663-672.
- 1126 **Mesquita, A., Cardenal-Munoz, E., Dominguez, E., Munoz-Braceras, S., Nunez-Corcuera,**  
1127 **B., Phillips, B. A., Tabara, L. C., Xiong, Q., Coria, R., Eichinger, L., et al.** (2017).  
1128 Autophagy in Dictyostelium: Mechanisms, regulation and disease in a simple biomedical  
1129 model. *Autophagy* **13**, 24-40.
- 1130 **Mittenthal, J. E. and Mazo, R. M.** (1983). A model for shape generation by strain and cell-cell  
1131 adhesion in the epithelium of an arthropod leg segment. *J. Theoret. Biol.* **100**, 443-483.
- 1132 **Mongera, A., Rowghanian, P., Gustafson, H. J., Shelton, E., Kealhofer, D. A., Carn, E. K.,**  
1133 **Serwane, F., Lucio, A. A., Giammona, J. and Campas, O.** (2018). A fluid-to-solid  
1134 jamming transition underlies vertebrate body axis elongation. *Nature* **561**, 401-405.
- 1135 **Monier, B. and Suzanne, M.** (2015). The morphogenetic role of apoptosis. *Curr Top Dev Biol*  
1136 **114**, 335-362.
- 1137 **Mora Van Cauwelaert, E., Arias Del Angel, J. A., Benitez, M. and Azpeitia, E. M.** (2015).  
1138 Development of cell differentiation in the transition to multicellularity: a dynamical  
1139 modeling approach. *Front Microbiol* **6**, 603.
- 1140 **Müller, G. B.** (2003). Homology: the evolution of morphological organization. In *Origination of*  
1141 *Organismal Form: Beyond the Gene in Developmental and Evolutionary Biology*. (ed. G.  
1142 B. Müller & S. A. Newman), pp. 51-69. Cambridge, MA: MIT Press.
- 1143 ---- (2017). Why an extended evolutionary synthesis is necessary. *Interface Focus* **7**, 20170015.
- 1144 **Müller, G. B. and Newman, S. A.** (2005). The innovation triad: an EvoDevo agenda. *J Exp*  
1145 *Zoolog B Mol Dev Evol* **304**, 487-503.
- 1146 **Nance, J.** (2014). Getting to know your neighbor: cell polarization in early embryos. *J Cell Biol*  
1147 **206**, 823-832.
- 1148 **Nanjundiah, V. and Saran, S.** (1992). The determination of spatial pattern in Dictyostelium  
1149 discoideum. *Journal of Biosciences* **17**, 353 - 394.
- 1150 **Nanjundiah, V. and Wurster, B.** (1989). Is there a cyclic-AMP-independent oscillator in  
1151 Dictyostelium discoideum? In *Cell to cell signalling. From experiments to theoretical*  
1152 *models* (ed. A. Goldbeter), pp. 489-502. Cambridge, Massachusetts: Academic Press.

- 1153 **Newman, S. A.** (2014a). Development and evolution: The physics connection. In *Conceptual*  
1154 *change in biology: scientific and philosophical perspectives on evolution and*  
1155 *development* (ed. A. C. Love), pp. 421-440. Dordrecht: Springer.
- 1156 **Newman, S. A.** (2014b). Physico-genetics of morphogenesis: the hybrid nature of developmental  
1157 mechanisms. In *Toward a theory of development* (ed. A. Minelli & T. Pradeu), pp. 95-  
1158 113. Oxford: Oxford University Press.
- 1159 **Newman, S. A.** (2016). 'Biogeneric' developmental processes: drivers of major transitions in  
1160 animal evolution. *Philos Trans R Soc Lond B Biol Sci* **371**.
- 1161 ---- (2019a). Inherency and homomorphy in the evolution of development. *Curr Opin Genet Dev*  
1162 **57**, 1-8.
- 1163 ---- (2019b). Inherency of form and function in animal development and evolution. *Front Physiol*  
1164 **10**, 702.
- 1165 ---- (2019c). Inherent forms and the evolution of evolution. *J Exp Zool B Mol Dev Evol* **332**, 331-  
1166 338.
- 1167 **Newman, S. A. and Bhat, R.** (2008). Dynamical patterning modules: physico-genetic  
1168 determinants of morphological development and evolution. *Phys. Biol.* **5**, 15008.
- 1169 ---- (2009). Dynamical patterning modules: a "pattern language" for development and evolution  
1170 of multicellular form. *Int J Dev Biol* **53**, 693-705.
- 1171 **Newman, S. A. and Comper, W. D.** (1990). 'Generic' physical mechanisms of morphogenesis  
1172 and pattern formation. *Development* **110**, 1-18.
- 1173 **Niklas, K. J. and Newman, S. A.** (2013). The origins of multicellular organisms. *Evol Dev* **15**,  
1174 41-52.
- 1175 ---- (eds) (2016). *Multicellularity: origins and evolution*. Cambridge, MA: The MIT Press.
- 1176 ---- (2019). The many roads to (and from) multicellularity. *J Exp Bot.*
- 1177 **Niklas, K. J., Wayne, R., Benítez, M. and Newman, S. A.** (2019). Polarity, planes of cell  
1178 division, and the evolution of plant multicellularity. *Protoplasma* **256**, 585-599.
- 1179 **Odell, G. M. and Bonner, J. T.** (1986). How the Dictyostelium discoideum grex crawls. *Phil.*  
1180 *Trans. Roy. Soc. Lond. B* **312**, 487-525.
- 1181 **Olson, M. E.** (2012). The developmental renaissance in adaptationism. *Trends Ecol Evol* **27**,  
1182 278-287.
- 1183 **Palsson, E.** (2008). A 3-D model used to explore how cell adhesion and stiffness affect cell  
1184 sorting and movement in multicellular systems. *J Theor Biol* **254**, 1-13.
- 1185 **Pigliucci, M. and Müller, G.** (eds) (2010). *Evolution, the extended synthesis*. Cambridge,  
1186 Mass.: MIT Press.
- 1187 **Qualls, G. T., Stephens, K. and White, D.** (1978). Morphogenetic movements and multicellular  
1188 development in the fruiting Myxobacterium, *Stigmatella aurantiaca*. *Dev Biol* **66**, 270-  
1189 274.
- 1190 **Raper, K.** (1940). Pseudoplasmodium formation and organization in Dictyostelium discoideum.  
1191 *J. Elisha Mitchell Sci. Soc.* **56**, 241-282
- 1192 **Rivera-Yoshida, N., Arias Del Angel, J. A. and Benitez, M.** (2018). Microbial multicellular  
1193 development: mechanical forces in action. *Curr Opin Genet Dev* **51**, 37-45.
- 1194 **Romeralo, M., Baldauf, S. and Escalante, R.** (2013a). *Dictyostelids : evolution, genomics and*  
1195 *cell biology*. Heidelberg ; New York: Springer.
- 1196 **Romeralo, M., Skiba, A., Gonzalez-Voyer, A., Schilde, C., Lawal, H., Kedziora, S.,**  
1197 **Cavender, J. C., Glockner, G., Urushihara, H. and Schaap, P.** (2013b). Analysis of

- 1198 phenotypic evolution in Dictyostelia highlights developmental plasticity as a likely  
1199 consequence of colonial multicellularity. *Proc Biol Sci* **280**, 20130976.
- 1200 **Satoh, H., Ueda, T. and Kobatake, Y.** (1985). Oscillations in cell shape and size during  
1201 locomotion and in contractile activities of Physarum polycephalum, Dictyostelium  
1202 discoideum, Amoeba proteus and macrophages. *Exp Cell Res* **156**, 79-90.
- 1203 **Savill, N. J. and Hogeweg, P.** (1997). Modelling morphogenesis: From single cells to crawling  
1204 slugs. *J Theor Biol* **184**, 229-235.
- 1205 **Schaap, P.** (2011). Evolution of developmental cyclic adenosine monophosphate signaling in the  
1206 Dictyostelia from an amoebozoan stress response. *Dev Growth Differ* **53**, 452-462.
- 1207 **Schaap, P., Winckler, T., Nelson, M., Alvarez-Curto, E., Elgie, B., Hagiwara, H., Cavender,**  
1208 **J., Milano-Curto, A., Rozen, D. E., Dingermann, T., et al.** (2006). Molecular  
1209 phylogeny and evolution of morphology in the social amoebas. *Science* **314**, 661-663.
- 1210 **Sheikh, S., Thulin, M., Cavender, J. C., Escalante, R., Kawakami, S. I., Lado, C., Landolt,**  
1211 **J. C., Nanjundiah, V., Queller, D. C., Strassmann, J. E., et al.** (2018). A New  
1212 Classification of the Dictyostelids. *Protist* **169**, 1-28.
- 1213 **Shimkets, L. J.** (1986). Correlation of energy-dependent cell cohesion with social motility in  
1214 Myxococcus xanthus. *J Bacteriol* **166**, 837-841.
- 1215 ---- (1999). Intercellular signaling during fruiting-body development of Myxococcus xanthus.  
1216 *Annu Rev Microbiol* **53**, 525-549.
- 1217 **Shimkets, L. J. and Kaiser, D.** (1982). Induction of coordinated movement of Myxococcus  
1218 xanthus cells. *J Bacteriol* **152**, 451-461.
- 1219 **Singer, G., Araki, T. and Weijer, C. J.** (2019). Oscillatory cAMP cell-cell signalling persists  
1220 during multicellular Dictyostelium development. *Commun Biol* **2**, 139.
- 1221 **Sogaard-Andersen, L., Overgaard, M., Lobedanz, S., Ellehauge, E., Jelsbak, L. and**  
1222 **Rasmussen, A. A.** (2003). Coupling gene expression and multicellular morphogenesis  
1223 during fruiting body formation in Myxococcus xanthus. *Mol Microbiol* **48**, 1-8.
- 1224 **Strogatz, S. H.** (2003). *Sync: the emerging science of spontaneous order* (1st edn). New York:  
1225 Theia.
- 1226 **Suzanne, M. and Steller, H.** (2013). Shaping organisms with apoptosis. *Cell Death Differ* **20**,  
1227 669-675.
- 1228 **Szadkowski, D., Harms, A., Carreira, L. A. M., Wigbers, M., Potapova, A., Wuichet, K.,**  
1229 **Keilberg, D., Gerland, U. and Sogaard-Andersen, L.** (2019). Spatial control of the  
1230 GTPase MglA by localized RomR-RomX GEF and MglB GAP activities enables  
1231 Myxococcus xanthus motility. *Nat Microbiol* **4**, 1344-1355.
- 1232 **Tan, R. Z. and Chiam, K. H.** (2014). Computational modeling reveals that a combination of  
1233 chemotaxis and differential adhesion leads to robust cell sorting during tissue patterning.  
1234 *PLoS One* **9**, e109286.
- 1235 **Tarnita, C. E., Taubes, C. H. and Nowak, M. A.** (2013). Evolutionary construction by staying  
1236 together and coming together. *J Theor Biol* **320**, 10-22.
- 1237 **Taylor, R. G. and Welch, R. D.** (2008). Chemotaxis as an emergent property of a swarm. *J*  
1238 *Bacteriol* **190**, 6811-6816.
- 1239 **Thorne, B. C., Bailey, A. M., DeSimone, D. W. and Peirce, S. M.** (2007). Agent-based  
1240 modeling of multicell morphogenic processes during development. *Birth Defects Res C*  
1241 *Embryo Today* **81**, 344-353.

- 1242 **Thutupalli, S., Sun, M., Bunyak, F., Palaniappan, K. and Shaevitz, J. W.** (2015). Directional  
1243 reversals enable *Myxococcus xanthus* cells to produce collective one-dimensional  
1244 streams during fruiting-body formation. *J R Soc Interface* **12**, 20150049.
- 1245 **Tomchik, K. J. and Devreotes, P. N.** (1981). Adenosine 3',5'-monophosphate waves in  
1246 *Dictyostelium discoideum*: a demonstration by isotope dilution--fluorography. *Science*  
1247 **212**, 443-446.
- 1248 **Travisano, M. and Velicer, G. J.** (2004). Strategies of microbial cheater control. *Trends*  
1249 *Microbiol* **12**, 72-78.
- 1250 **Trenchard, H.** (2019). Cell pelotons: A model of early evolutionary cell sorting, with  
1251 application to slime mold *Dictyostelium discoideum*. *J Theor Biol* **469**, 75-95.
- 1252 **True, J. R. and Haag, E. S.** (2001). Developmental system drift and flexibility in evolutionary  
1253 trajectories. *Evol Dev* **3**, 109-119.
- 1254 **Turing, A. M.** (1952). The chemical basis of morphogenesis. *Phil. Trans. Roy. Soc. Lond. B*  
1255 **237**, 37-72.
- 1256 **Umeda, T. and Inouye, K.** (2002). Possible role of contact following in the generation of  
1257 coherent motion of *Dictyostelium* cells. *J Theor Biol* **219**, 301-308.
- 1258 ---- (2004). Cell sorting by differential cell motility: a model for pattern formation in  
1259 *Dictyostelium*. *J Theor Biol* **226**, 215-224.
- 1260 **Vasiev, B. and Weijer, C. J.** (2003). Modelling of *Dictyostelium discoideum* slug migration. *J*  
1261 *Theor Biol* **223**, 347-359.
- 1262 **Vavilov, N. I.** (1922). The law of homologous series in variation. *Journal of Genetics* **12**, 47-89.
- 1263 **Vermeer, J. E. and Geldner, N.** (2015). Lateral root initiation in *Arabidopsis thaliana*: a force  
1264 awakens. *F1000Prime Rep* **7**, 32.
- 1265 **Volfson, D., Cookson, S., Hasty, J. and Tsimring, L. S.** (2008). Biomechanical ordering of  
1266 dense cell populations. *Proc Natl Acad Sci U S A* **105**, 15346-15351.
- 1267 **Whitworth, D. E.** (2008). *Myxobacteria: multicellularity and differentiation*. Washington, DC:  
1268 ASM Press.
- 1269 **Wu, Y., Kaiser, A. D., Jiang, Y. and Alber, M. S.** (2009). Periodic reversal of direction allows  
1270 *Myxobacteria* to swarm. *Proc Natl Acad Sci U S A* **106**, 1222-1227.
- 1271 **Yang, Z. and Higgs, P. I.** (2014). *Myxobacteria: genomics, cellular and molecular biology*.  
1272 Norfolk, U.K.: Caister Academic Press.
- 1273 **York, J. R. and McCauley, D. W.** (2020). The origin and evolution of vertebrate neural crest  
1274 cells. *Open Biol* **10**, 190285.
- 1275 **Zhang, H., Vaksman, Z., Litwin, D. B., Shi, P., Kaplan, H. B. and Igoshin, O. A.** (2012). The  
1276 mechanistic basis of *Myxococcus xanthus* rippling behavior and its physiological role  
1277 during predation. *PLoS Comput Biol* **8**, e1002715.
- 1278 **Zhang, L., Wang, H., Fang, X., Stackebrandt, E. and Ding, Y.** (2003). Improved methods of  
1279 isolation and purification of myxobacteria and development of fruiting body formation of  
1280 two strains. *J Microbiol Methods* **54**, 21-27.
- 1281 **Zhang, N. and Cao, L.** (2017). Starvation signals in yeast are integrated to coordinate metabolic  
1282 reprogramming and stress response to ensure longevity. *Curr Genet* **63**, 839-843.
- 1283 **Zhang, Z., Igoshin, O. A., Cotter, C. R. and Shimkets, L. J.** (2018). Agent-Based Modeling  
1284 Reveals Possible Mechanisms for Observed Aggregation Cell Behaviors. *Biophys J* **115**,  
1285 2499-2511.
- 1286 **Zusman, D. R., Scott, A. E., Yang, Z. and Kirby, J. R.** (2007). Chemosensory pathways,  
1287 motility and development in *Myxococcus xanthus*. *Nat Rev Microbiol* **5**, 862-872.

## Figure legends

1288  
1289  
1290  
1291  
1292  
1293  
1294  
1295  
1296  
1297  
1298  
1299  
1300  
1301  
1302  
1303  
1304  
1305  
1306  
1307  
1308  
1309  
1310  
1311  
1312  
1313

**Figure 1.** (Upper panel) Life cycle of *Myxobacteria xanthus*, a representative multicellular myxobacterium. The circle on the left represents the proliferative mode that occurs in a nutrient-replete setting. The oval on the right shows the sequence of stages initiated under conditions of starvation: clockwise, from top left, aggregation, mound formation, fruiting body formation and spore differentiation. Spores can be dispersed and may germinate as single vegetative cells under nutrient-rich conditions. (Lower panel) Life cycle of *Dictyostelium discoideum*, a representative dictyostelid. The circle on the left represents the proliferative mode that occurs in a nutrient-replete setting. The oval on the right shows the sequence of stages initiated under conditions of starvation (clockwise, from top left: starved amoebae, developing aggregation, late aggregations, migrating slug, developing fruiting body, finished fruiting body with spore mass supported by an erect stalk, amoebae emerging from spores after dispersal).

**Figure 2.** Schematic representation of (left, top) a selection of generic physical effects and one of their underlying mediators (cell-cell adhesion), and (left, bottom) a selection of agent-like effects, all of which pertain to aggregative multicellular organisms such as myxobacteria and dictyostelids. Some individual cell behaviors like biochemical or polarity oscillation can, when they operate in the multicellular context, can mediate global generic effects, like morphogenetic fields in which cell state is coordinated over large distances. Generic processes can lead to convergent morphologies since they employ the same mesoscale physics despite genetic divergence. Agent-based processes can lead to lineage-specific behaviors and morphological motifs, but also convergent or parallel ones if they act in analogous fashions. See main text for additional examples of generic and agent effects, and descriptions of their morphogenetic roles.

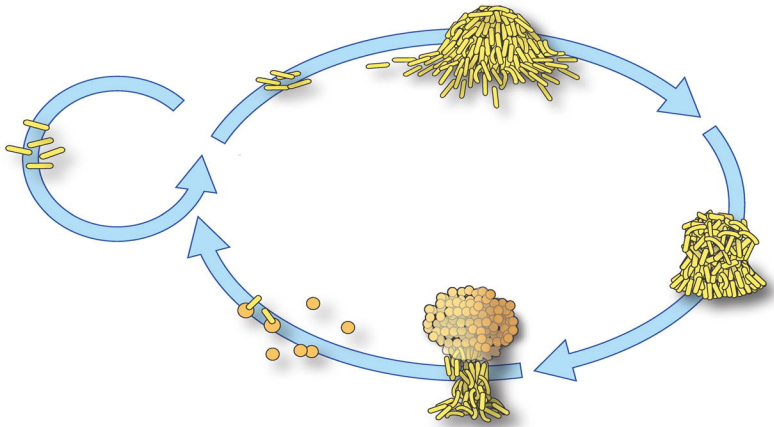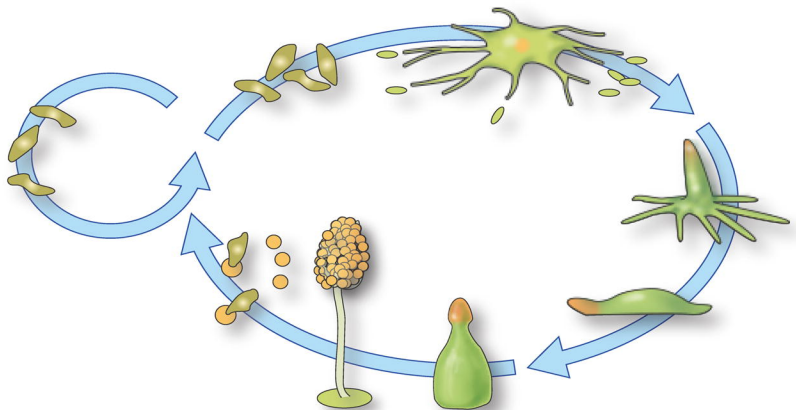

## Generic properties

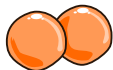

Adhesion

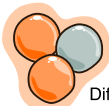

Differential loss of mass

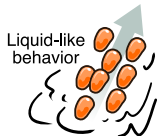

Liquid-like behavior

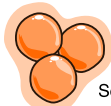

Solidification

Convergent traits and behaviors

Synchronization  
Field formation

## Agent-like properties

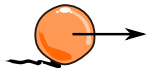

Directed migration

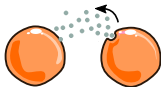

Active signaling

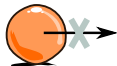

Cessation of movement

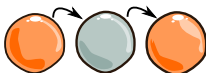

Oscillation

Lineage-specific  
traits and behaviors
